# Supplementary material
Source: PubMed Central journal article supplement (PMC7103936)
Supplement: mmc4.pdf [file mmc4.pdf]

## Type I Interferon Receptor Signaling of Neurons and Astrocytes Regulates Microglia Activation during Viral Encephalitis

### Graphical Abstract

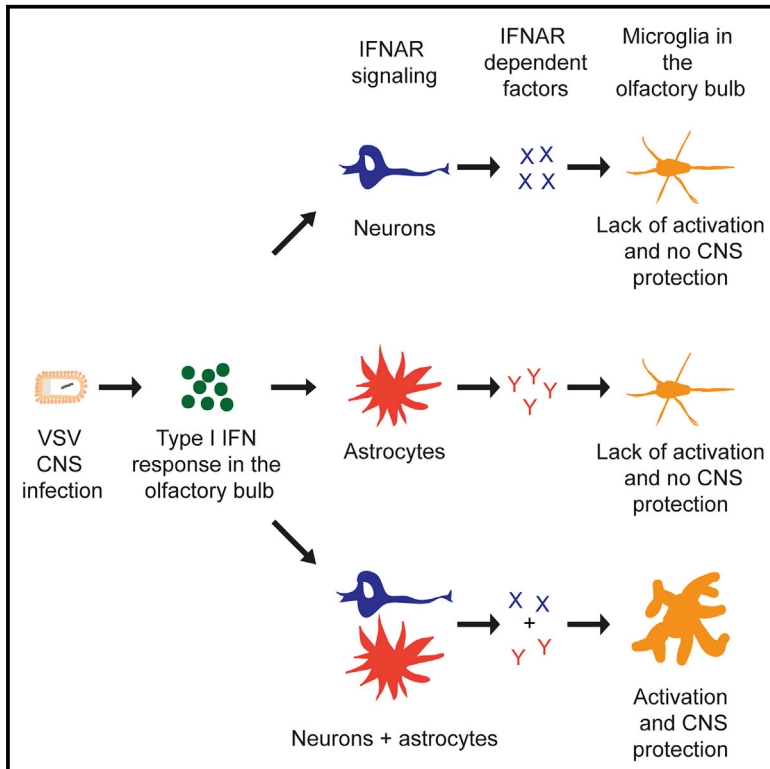

### Authors

Chintan Chhatbar, Claudia N. Detje, Elena Grabski, ..., Frank Bradke, Martin Stangel, Ulrich Kalinke

### Correspondence

stangel.martin@mh-hannover.de (M.S.), ulrich.kalinke@twincore.de (U.K.)

### In Brief

The mechanisms restricting viral entry into the CNS via the olfactory route were unclear. Chhatbar et al. show that intercellular communication within the olfactory bulb (OB) among neurons, astrocytes, and microglia orchestrates formation of a microglial barrier that restricts the spread of the virus into the CNS.

### Highlights

- VSV infection via the olfactory route leads to accumulation of microglia in the OB
- Following infection, microglia form an innate immune barrier in the OB
- The microglia barrier prevents viral CNS penetration via the olfactory route
- IFNAR signaling of neurons and astrocytes regulates microglia barrier formation

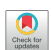

# Type I Interferon Receptor Signaling of Neurons and Astrocytes Regulates Microglia Activation during Viral Encephalitis

Chintan Chhatbar,<sup>1</sup> Claudia N. Detje,<sup>1</sup> Elena Grabski,<sup>1,10</sup> Katharina Borst,<sup>1,11</sup> Julia Spanier,<sup>1</sup> Luca Ghita,<sup>1</sup> David A. Elliott,<sup>2,12</sup> Marta Joana Costa Jordão,<sup>3,4</sup> Nora Mueller,<sup>5</sup> James Sutton,<sup>6,13</sup> Chittappen K. Prajeeth,<sup>7</sup> Viktoria Gudi,<sup>7</sup> Michael A. Klein,<sup>5</sup> Marco Prinz,<sup>3,8</sup> Frank Bradke,<sup>2</sup> Martin Stangel,<sup>7,9,\*</sup> and Ulrich Kalinke<sup>1,9,14,\*</sup>

<sup>1</sup>Institute for Experimental Infection Research, TWINCORE, Centre for Experimental and Clinical Infection Research, A Joint Venture between the Helmholtz Centre for Infection Research and the Hannover Medical School, Hannover, Germany

<sup>2</sup>Axonal Growth and Regeneration Group, German Center for Neurodegenerative Disease Research (DZNE), Bonn, Germany

<sup>3</sup>Institute of Neuropathology, Freiburg University Medical Centre, Freiburg, Germany

<sup>4</sup>Faculty of Biology, University of Freiburg, Freiburg, Germany

<sup>5</sup>Institute for Virology and Immunobiology, University of Wuerzburg, Wuerzburg, Germany

<sup>6</sup>Novartis Institutes for Biomedical Research, Emeryville, CA, USA

<sup>7</sup>Clinical Neuroimmunology and Neurochemistry, Department of Neurology, Hannover Medical School, Hannover, Germany

<sup>8</sup>BIOS Centre for Biological Signaling Studies, University of Freiburg, Freiburg, Germany

<sup>9</sup>Center for Systems Neuroscience, Hannover, Germany

<sup>10</sup>Present address: Division of Virology, Section Viral Vaccines, Paul Ehrlich Institute, Federal Institute for Vaccines and Biomedicines, Langen, Germany

<sup>11</sup>Present address: Institute of Neuropathology, Freiburg University Medical Centre, Freiburg, Germany

<sup>12</sup>Present address: Hotchkiss Brain Institute Advanced Microscopy Platform, University of Calgary, Calgary, AB T2N 4N1, Canada

<sup>13</sup>Present address: IDEAYA Biosciences, Inc., 2200 Sand Hill Road, Suite 110, Menlo Park, CA 94025, USA

<sup>14</sup>Lead Contact

\*Correspondence: [stangel.martin@mh-hannover.de](mailto:stangel.martin@mh-hannover.de) (M.S.), [ulrich.kalinke@twincore.de](mailto:ulrich.kalinke@twincore.de) (U.K.)

<https://doi.org/10.1016/j.celrep.2018.09.003>

## SUMMARY

In sterile neuroinflammation, a pathological role is proposed for microglia, whereas in viral encephalitis, their function is not entirely clear. Many viruses exploit the odorant system and enter the CNS via the olfactory bulb (OB). Upon intranasal vesicular stomatitis virus instillation, we show an accumulation of activated microglia and monocytes in the OB. Depletion of microglia during encephalitis results in enhanced virus spread and increased lethality. Activation, proliferation, and accumulation of microglia are regulated by type I IFN receptor signaling of neurons and astrocytes, but not of microglia. Morphological analysis of myeloid cells shows that type I IFN receptor signaling of neurons has a stronger impact on the activation of myeloid cells than of astrocytes. Thus, in the infected CNS, the cross talk among neurons, astrocytes, and microglia is critical for full microglia activation and protection from lethal encephalitis.

## INTRODUCTION

Acute viral infections of the CNS are rare, but can be devastating. Rabies is a prototypic acute neurotropic zoonotic infection causing many deaths worldwide (John et al., 2015). Other zoonotic pathogens that cause encephalitis include Japanese encephalitis virus (JEV), Dengue virus (DenV), and West Nile virus

(WNV) and are often associated with pathologies such as high morbidity, mortality, and post-recovery neurocognitive deficits (John et al., 2015; Sadek et al., 2010). These pathogens are shown to enter the CNS through the olfactory bulb (OB) (Kalinke et al., 2011; Koyuncu et al., 2013; van Riel et al., 2015).

Upon intranasal instillation, vesicular stomatitis virus (VSV), which is a prototype neurotropic virus closely related to rabies virus, infects olfactory sensory neurons in the nasal epithelium (Lundh et al., 1987) and moves along the axons to the OB (Reiss et al., 1998). Within the OB, neurons seem to get productively infected, whereas astrocytes are abortively infected (Pfefferkorn et al., 2015). *In vivo* infection of microglia with VSV has also been shown in very young mice (Chauhan et al., 2010); however, this was not observed in adult mice (Pfefferkorn et al., 2015). Protective IFN- $\beta$  is induced locally within the OB, primarily in astrocytes and to a lesser extent in neurons (Detje et al., 2015; Pfefferkorn et al., 2015), and the virus is efficiently arrested in a type I interferon receptor (IFNAR)-dependent manner so that the host is protected from lethal encephalitis (Detje et al., 2009). In addition to the induction of interferon- $\beta$  (IFN- $\beta$ ), CNS infection via the olfactory route results in recruitment of myeloid cells such as microglia (Getts et al., 2008), and peripheral immune cells such as dendritic cells (DCs) (D'Agostino et al., 2012), T cells, monocytes, and others (Steel et al., 2009) into the CNS.

Microglia are long-lived CNS parenchymal innate immune cells that arise from erythro-myeloid precursors and populate the neuroectoderm early during development (Ginhoux et al., 2010; Kierdorf et al., 2013; Schulz et al., 2012). Microglia play an essential role in homeostasis as well as in inflammatory processes within the CNS (Nayak et al., 2014; Prinz and Priller,

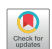

2014). Although a lot is known about their function during sterile inflammation, the role of microglia is less understood in viral encephalitis. During WNV encephalitis, microglia mediate synaptic loss that drives memory deficits (Vasek et al., 2016). Pharmacological inhibition of CSF-1R that results in microglia depletion revealed their protective role in coronavirus encephalitis (Wheeler et al., 2018). Thus, microglia can have both beneficial as well as detrimental roles during viral encephalitis.

Understanding the regulation of microglia responses during viral encephalitis is critical to develop new treatment strategies against viral encephalitis. It was previously shown that IFNAR signaling plays an essential role in regulating innate myeloid cell dynamics during viral encephalitis (Nayak et al., 2013). However, Nayak et al. used the ubiquitous IFNAR-deficient animals that lack IFNAR signaling on all cells. Thus, this study could not reveal the role of IFNAR signaling of different cell subsets of the CNS in the regulation of myeloid cell responses during viral encephalitis. Few studies revealed the critical role of IFNAR signaling of astrocytes in protection during viral encephalitis (Daniels et al., 2017; Hwang and Bergmann, 2018); however, the role of IFNAR signaling of neurons during viral encephalitis has not been addressed at all so far. Furthermore, intercellular communication in the CNS has not yet been addressed for viral encephalitis.

Here, we investigated the contribution of different CNS cell types in regulating myeloid cell activation during VSV encephalitis by using animals that allow deletion of IFNAR signaling on selected CNS cell subsets such as astrocyte, neurons, and microglia. We found that VSV infection via the olfactory route induces accumulation of activated microglia and monocytes in the OB via local proliferation and infiltration. Accumulated microglia form an innate immune barrier in peripheral areas of the OB, which plays a key role in restricting VSV spread within the CNS and protects against lethal encephalitis. Formation of the innate microglia barrier is regulated by IFNAR signaling of neurons and astrocytes, but not of microglia. Our data show mechanisms of regulation of microglia responses during viral encephalitis via intercellular communication.

## RESULTS

### Upon Intranasal VSV Infection, Myeloid Cells Accumulate in the Glomerular Layer of the OB

To understand the response of CNS-resident myeloid cells such as microglia and monocytes upon virus infection via the olfactory route, wild-type (WT) mice were intranasally (i.n.) infected with VSV and sections of the OB were analyzed by immunohistology. Immunolabeling of Iba-1, a common marker for microglia and infiltrating monocytes, revealed that 4 and 6 days post-infection (dpi) increased numbers of Iba-1<sup>+</sup> cells were present in the OB (Figure 1A). Quantitation of Iba-1<sup>+</sup> cells in the glomerular cell layer of the OB, to which olfactory sensory neurons project their axons into, and in the central region called granule cell layer (see Figure S1A for details) (Kalinke et al., 2011), showed that increased numbers of Iba-1<sup>+</sup> cells accumulated in the glomerular layer at 4 and 6 dpi (Figure 1B) and significantly more Iba-1<sup>+</sup> cells accumulated in the glomerular cell layer compared with the granule cell layer on 6 dpi (Figure S1B).

Iba-1<sup>+</sup> cells from control animals showed small cell bodies with long and thin processes typical of resting microglia. In

contrast, Iba-1<sup>+</sup> cells from infected animals had enlarged globular shaped cell bodies without or with short and thick processes implying an activated phenotype (Figure 1A, inset). This was confirmed by immunolabeling of the activation marker Mac-3 that was detected on Iba-1<sup>+</sup> cells of infected but not control animals (Figure 1A). Flow cytometry analysis of immune cells from the brain revealed that in control animals most CD11b<sup>+</sup> cells expressed low levels of CD45, a characteristic feature of microglia, whereas very few cells expressed high levels of CD45 (Figure 1C). Upon VSV infection, increased percentages of CD11b<sup>+</sup>CD45<sup>hi</sup> cells were detected, further confirming accumulation of myeloid cells (Figures 1C and 1D).

To address whether the increase in myeloid cells was particularly abundant in certain brain areas, OBs, cerebrae, cerebellae, and brainstems from several animals were pooled and flow cytometry was performed. In non-infected animals, all brain areas showed low abundance of CD45<sup>hi</sup>CD11b<sup>hi</sup> cells (Figure 1E), whereas upon VSV infection only the OB showed significantly increased CD45<sup>hi</sup>CD11b<sup>hi</sup> cells (Figures 1E and 1F). There were no significant changes in CD45<sup>low</sup>CD11b<sup>low</sup> as well as CD45<sup>+</sup>CD11b<sup>-</sup> cells (Figure 1G). In non-infected control animals, a small number of myeloid cells showed expression of the anti-inflammatory marker CD206, a C-type lectin receptor, which was downregulated upon VSV infection, whereas expression of CD86, a marker of activated myeloid cells, was upregulated on myeloid cells upon infection (Figures S1C and S1D) (Greter et al., 2015). CX3CR1, a marker expressed by myeloid cells and microglia, which is involved in microglia-neuron communication (Ransohoff and Cardona, 2010), was expressed at particularly enhanced levels in the OB of infected animals (Figures S1C and S1D). In infected animals, most of the CD45<sup>hi</sup>CD11b<sup>hi</sup> cells expressed high levels of Ly6C (Figure S1D), suggesting that many of these cells were infiltrating monocytes.

Next, we analyzed whether the accumulation of Iba-1<sup>+</sup> cells applied to the entire OB. For this, *CX3CR1-cre<sup>ER+/+</sup>-td-tomato<sup>S<sup>Wt</sup></sup>* reporter mice were tamoxifen treated. After 8 weeks, only long-lived CNS-resident myeloid cells such as microglia were marked by td-tomato reporter expression, whereas blood monocytes were replenished by non-marked cells (Figures S1E–S1G) (Goldmann et al., 2016). Such microglia marked mice were infected i.n. with VSV and on 6 dpi light sheet microscopy was performed from the OB (Ertürk et al., 2011). Three-dimensional (3D) reconstruction of the OB from non-infected animals showed randomly distributed td-tomato expression, whereas upon VSV infection accumulation of td-tomato expressing microglia was detected in the periphery of the entire OB (Figure 1H; Video S1). Thus, immunofluorescence imaging together with flow cytometry and light sheet microscopy revealed that upon i.n. VSV infection activated myeloid cells, especially microglia, accumulated in the glomerular region of the entire OB.

### Myeloid Cells Present in the OB upon VSV Infection Comprise Proliferating Microglia and Infiltrating Monocytes, which Show Distinct Gene Expression Profiles

Immunohistological studies revealed the presence of Iba-1<sup>+</sup>Ki-67<sup>+</sup> cells in the OB 6 dpi after VSV infection, but not in controls

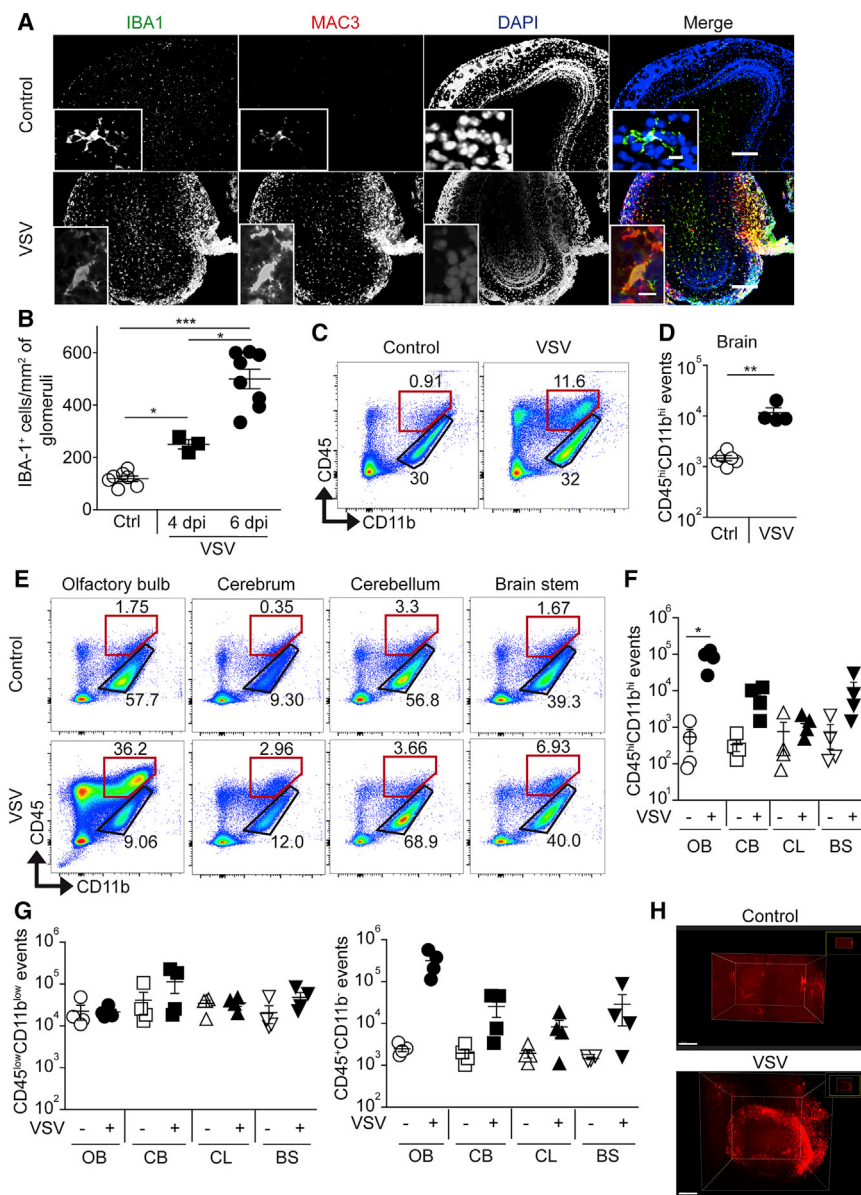

**Figure 1. Upon Intranasal VSV Instillation, Activated Myeloid Cells Accumulate in the Glomerular Layer of the Olfactory Bulb**

C57BL/6 WT mice were intranasally (i.n.) instilled with  $10^3$  plaque-forming units (PFU) of VSV or PBS. On 4 and 6 days post-infection (dpi), animals were perfused and brains were prepared.

(A) Slices of the olfactory bulb (OB) were immunolabeled with antibodies directed against Iba-1 and Mac-3, and counterstained with DAPI, and immunofluorescence microscopy was performed. (B) Quantitation of Iba-1<sup>+</sup> cells in the OB glomeruli in (A) (n = 3–8, N = 2, combined data).

(C) Representative flow cytometry data of immune cells present in the CNS on 6 dpi.

(D) Quantitation of CD45<sup>hi</sup>CD11b<sup>hi</sup> myeloid cells in (C) (red marked population; n = 4–6, N = 2, combined data).

(E) Representative flow cytometry data of immune cells present in the OB, cerebrum (CB), cerebellum (CL), and brainstem (BS) on 6 dpi.

(F) Quantitation of CD45<sup>hi</sup>CD11b<sup>hi</sup> myeloid cells in (E) (10 tissues pooled for OB and 5 for other regions in each experiment; N = 4, combined data). (G) Quantitation of CD45<sup>low</sup>CD11b<sup>low</sup> and CD45<sup>+</sup>CD11b<sup>-</sup> events in (E) (10 brain areas pooled for OB and 5 for other regions in each experiment; N = 4, combined data).

(H) Three-dimensional reconstruction of the entire unsectioned OB from *CX3CR1-cre-ER<sup>+/+</sup>-td-tomato<sup>Su/Wt</sup>* mice on 6 dpi highlighting microglia accumulation in the periphery of OB (representative data; N = 2). Data are shown as mean ± SEM. \*p < 0.05, \*\*p < 0.01, and \*\*\*p < 0.001. Scale bar in (A) is 200 μm for main panels and 10 μm for insets, and in (H) is 1 mm.

(Figures 2A and 2B, insets; Figure S2A), suggesting that upon infection Iba-1<sup>+</sup> cells proliferated. To address whether accumulating Iba-1<sup>+</sup> cells were exclusively microglia or also infiltrating monocytes, immune cells from brains of VSV-infected tamoxifen-treated *CX3CR1-cre-ER<sup>+/+</sup>-td-tomato<sup>Su/Wt</sup>* reporter mice were analyzed by flow cytometry. In these animals also VSV infection led to a significant accumulation of CD45<sup>hi</sup>CD11b<sup>hi</sup> cells in the brain (Figures 2C and 2D). It is proposed that during CNS inflammation microglia can upregulate CD45 expression and become indistinguishable from infiltrating monocytes (Greter et al., 2015; Yamasaki et al., 2014). In order to verify this, expression of the td-tomato reporter was analyzed in the CD45<sup>hi</sup>CD11b<sup>hi</sup> population. Indeed, among CD45<sup>hi</sup>CD11b<sup>hi</sup> cells increased numbers of td-tomato<sup>+</sup> cells were detected on 6 dpi compared with controls (Figures 2E and 2G). Since in these mice CNS-associated perivas-

cular macrophages (PVMs) also remain td-tomato<sup>+</sup> after 8 weeks of tamoxifen injection (Goldmann et al., 2016), we stained for Tmem119, a microglia-specific marker (Bennett et al., 2016), and CD206, a PVM marker (Mrdjen et al., 2018), to exclude PVMs from the analysis. In control animals, most of the cells in the CD45<sup>low</sup>CD11b<sup>low</sup> population expressed Tmem119, whereas basically no cells in the CD45<sup>hi</sup>CD11b<sup>hi</sup> population expressed Tmem119 (Figure 2F; Figure S2B). However, upon VSV infection, there was a significant increase in the Tmem119<sup>+</sup>CD206<sup>-</sup> cells within the CD45<sup>hi</sup>CD11b<sup>hi</sup> population (Figures 2F and 2G), confirming the presence of microglia in the CD45<sup>hi</sup>CD11b<sup>hi</sup> population from infected animals. A significant increase in td-tomato<sup>+</sup>Ly6C<sup>+</sup> events also confirmed infiltration of peripheral monocytes in the CNS (Figures 2E and 2G; Figures S2C and S2D). Bromodeoxyuridine (BrdU) labeling experiments in these mice revealed that CD45<sup>low</sup>CD11b<sup>low</sup> cells did not show significant BrdU incorporation, whereas CD45<sup>hi</sup>CD11b<sup>hi</sup> cells showed significantly increased percentages of BrdU-positive cells in infected animals (Figures 2H and 2I). Together, these data show that upon i.n. VSV infection proliferating microglia and infiltrating monocytes accounted for the accumulation of myeloid cells within the CNS.

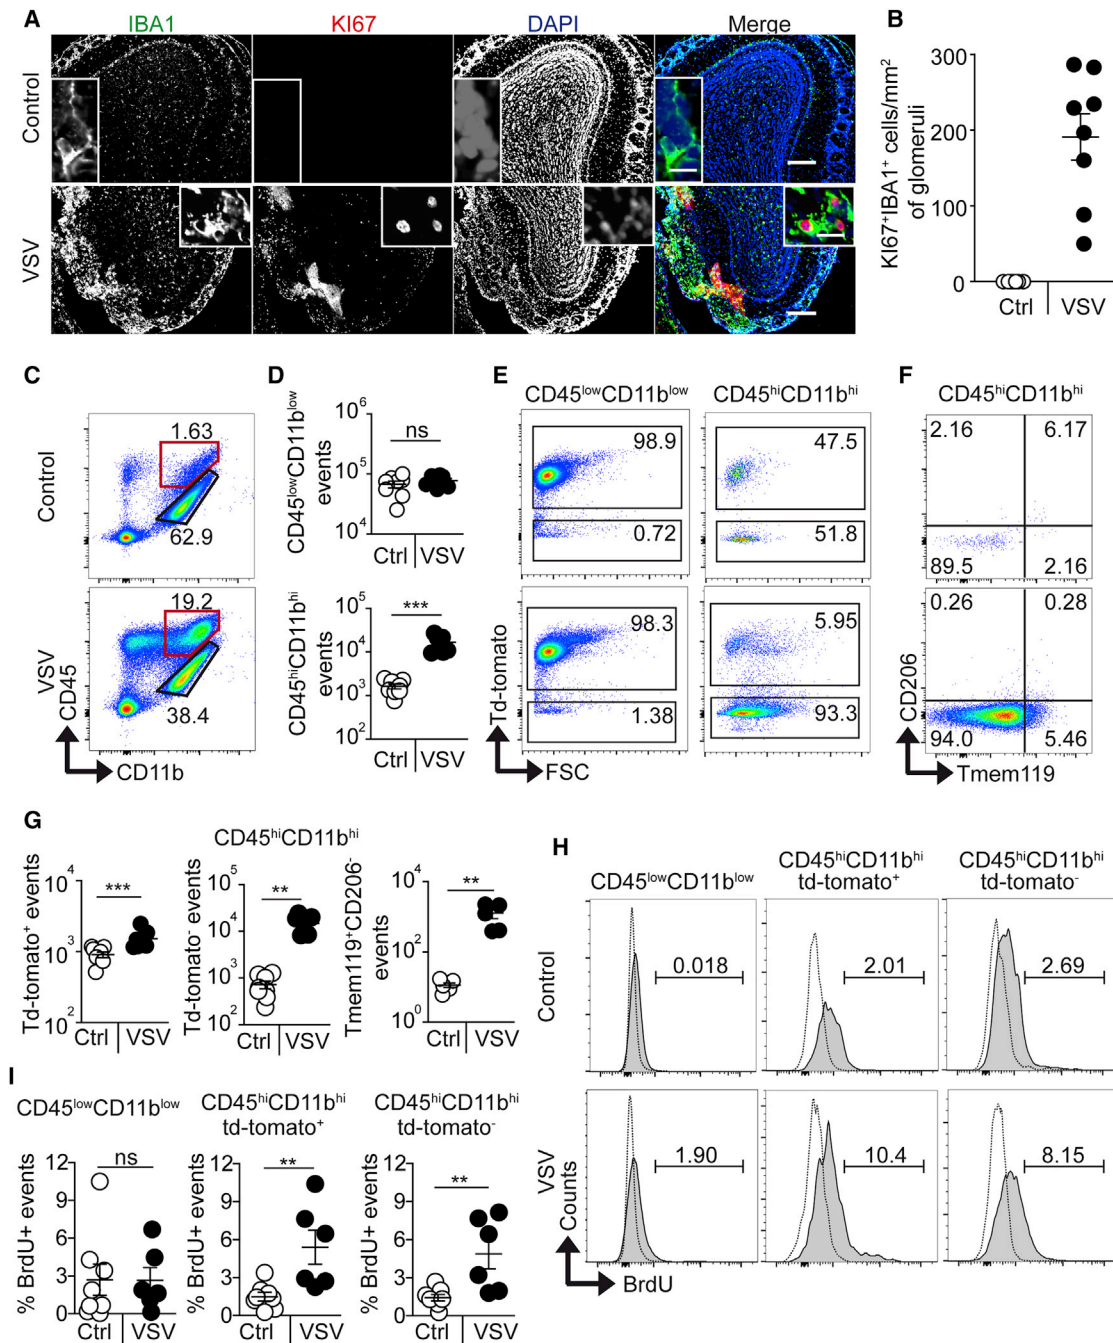

**Figure 2. In the OB of VSV-Infected Mice, Accumulated Myeloid Cells Comprise Proliferating Microglia and Infiltrating Monocytes**

Mice were treated as described in Figure 1, and brains were removed on 6 dpi after PBS perfusion, unless otherwise stated.

(A) Slices of the OB were immunolabeled with antibodies directed against Iba-1 and Ki-67, and counterstained with DAPI, and immunofluorescence microscopy was performed.

(B) Quantitation of Iba-1<sup>+</sup>Ki-67<sup>+</sup> cells in the OB glomeruli in (A) (n = 7–8, N = 2, combined data; p < 0.001, one-sample t test).

(C) Representative flow cytometry data of immune cells present in the CNS of *CX3CR1-cre<sup>ER+/+</sup>-td-tomato<sup>St/Wt</sup>* animals.

(D) Quantitation of CD45<sup>low</sup>CD11b<sup>low</sup> and CD45<sup>hi</sup>CD11b<sup>hi</sup> events in (C) (n = 8, N = 2, combined data).

(E) Representative data for td-tomato reporter expression in cells from (C).

(F) Representative data for expression of Tmem119 and CD206 in CD45<sup>hi</sup>CD11b<sup>hi</sup> cells in *CX3CR1-cre<sup>ER+/+</sup>-td-tomato<sup>St/Wt</sup>* animals. Mice were not perfused for Tmem119 staining experiment.

(legend continued on next page)

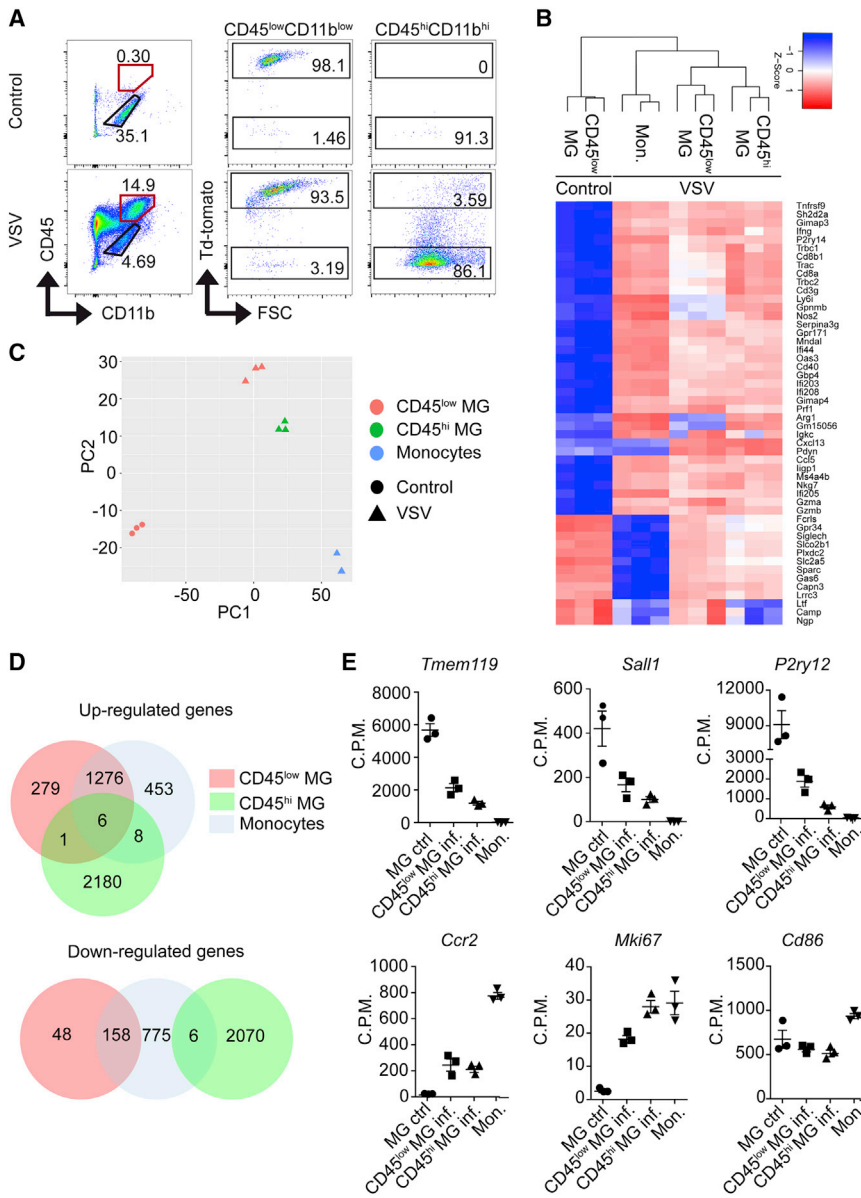

**Figure 3. Myeloid Cell Subsets within the OB of Infected Animals Consist of CD45<sup>hi</sup> Microglia and Show Distinct Gene Expression Profiles**

Tamoxifen-treated *CX3CR1-cre-ER<sup>+/+</sup>-td-tomato<sup>SVW</sup>* mice were treated as described in Figure 1. On 6 dpi, mice were perfused and immune cells from OB were isolated. CD45<sup>low</sup>CD11b<sup>low</sup> microglia from control animals (MG ctrl.) and CD45<sup>low</sup>CD11b<sup>low</sup> microglia (CD45<sup>low</sup> MG inf.), CD45<sup>hi</sup>CD11b<sup>hi</sup>td-tomato<sup>+</sup> microglia (CD45<sup>hi</sup> MG inf.), and CD45<sup>hi</sup>CD11b<sup>hi</sup>td-tomato<sup>-</sup>Ly6G<sup>-</sup> infiltrating monocytes (Mon.) from infected animals were FACS sorted.

(A) Flow cytometry data of immune cells isolated from OB. Three OBs were pooled for control animals, and five OBs were pooled for VSV-infected animals (representative data, N = 2).

(B) Expression analysis for most regulated genes from the different myeloid cell populations between control and VSV-infected animals.

(C) Principal-component analysis of different myeloid cell populations.

(D) Venn diagram describing numbers of common and different genes regulated between indicated populations compared to CD45<sup>low</sup>CD11b<sup>low</sup> microglia of control animals.

(E) mRNA expression levels of the indicated genes in different myeloid cell populations.

tion, we observed the emergence of CD45<sup>hi</sup>CD11b<sup>hi</sup>td-tomato<sup>+</sup> cells, suggesting that upon infection a part of the CD45<sup>low</sup> microglia present in the OB upregulated CD45 and became CD45<sup>hi</sup> (Figure 3A). RNA-sequencing (RNA-seq) analysis showed significant changes in the regulation of genes between myeloid cells from VSV-infected compared with control animals. Regulated genes were involved in IFN responses, immune responses and its regulation, responses to inflammation, antigen processing and presentation, and regulation of plasma membrane and cell surface-associated functions (Figure 3B).

Since we observed three different populations of myeloid cells comprising microglia and monocytes in the CNS of VSV-infected animals, we further investigated the presence of CD45<sup>hi</sup> microglia in the OB of infected animals and characterized these cells by sorting CD45<sup>low</sup>CD11b<sup>low</sup> microglia, CD45<sup>hi</sup>CD11b<sup>hi</sup>td-tomato<sup>+</sup> microglia, and CD45<sup>hi</sup>CD11b<sup>hi</sup>td-tomato<sup>-</sup>Ly6G<sup>-</sup> infiltrating monocytes, and performing RNA sequencing. In control animals, myeloid cells consisted mostly of CD45<sup>low</sup>CD11b<sup>low</sup> microglia, with very few CD45<sup>hi</sup>CD11b<sup>hi</sup> cells that did not express td-tomato, suggesting that these cells were not PVMs. However, upon infec-

Principal-component analysis showed that infection induced a major change in the gene expression profiles of microglia and that microglia and monocytes present in the OB had distinct gene signatures (Figure 3C). Interestingly, even though CD45<sup>hi</sup>CD11b<sup>hi</sup> microglia in infected animals were derived mostly from CD45<sup>low</sup>CD11b<sup>low</sup> microglia, both populations had distinct gene expression profiles with only few genes commonly regulated between them (Figure 3D).

Detailed expression analysis of myeloid cell-associated genes showed that transcripts for several microglia-specific genes

(G) Quantitation of td-tomato<sup>+</sup> and td-tomato<sup>-</sup> events in CD45<sup>hi</sup>CD11b<sup>hi</sup> cells from (E) and *Tmem119*<sup>+</sup>*CD206*<sup>-</sup> events in (F) (n = 5–8, N = 2, combined data).

(H) Representative data for BrdU incorporation in different myeloid cell populations (dotted line, unstained control; solid line, stained sample).

(I) Percentage of BrdU<sup>+</sup> events in (H) (n = 6–8, N = 2, combined data). Data are shown as mean ± SEM. \*\*p < 0.01, \*\*\*p < 0.001; ns, not significant. Scale bar in (A) is 200 μm for main panels and 10 μm for insets.

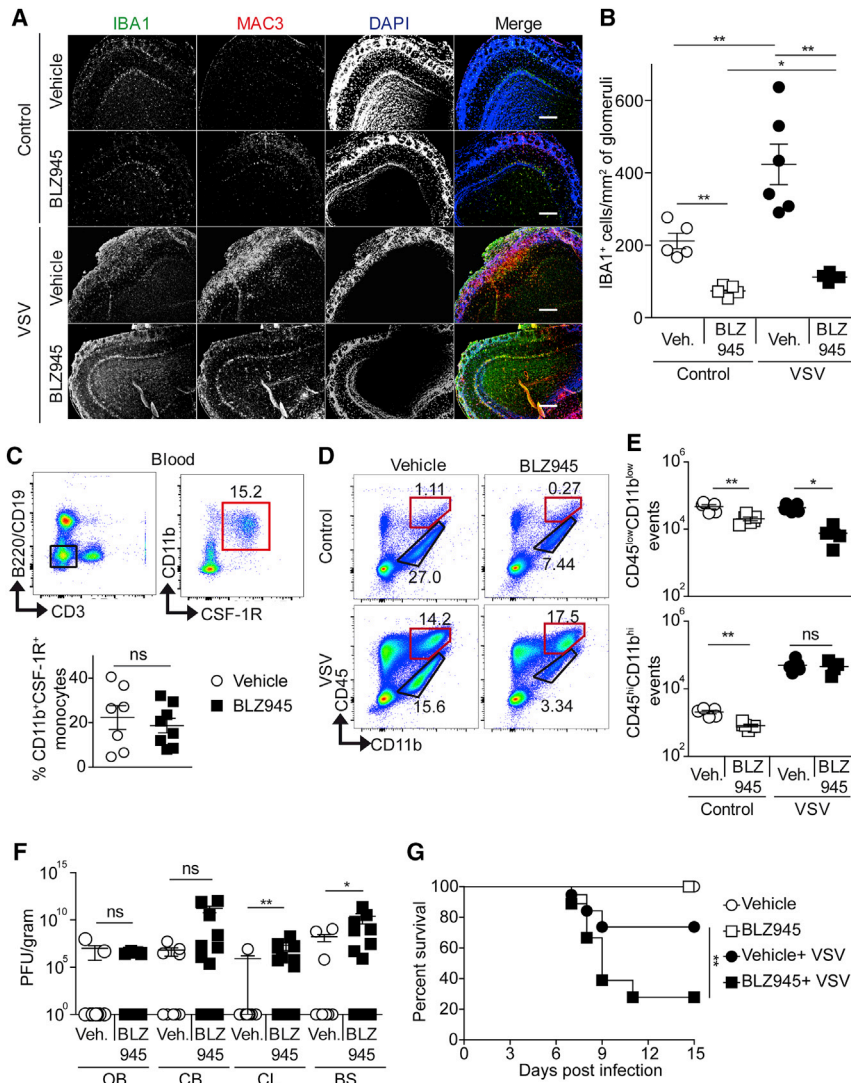

### Figure 4. Depletion of Microglia via CSF-1R Inhibitor Treatment during VSV Infection Leads to Increased Virus Spread within the CNS and Enhanced Mortality

WT mice were i.n. instilled with PBS or  $10^3$  PFU VSV and given vehicle or BLZ945 per os (p.o.) daily from the day of infection until 6 dpi. Mice were left alone for survival studies, or blood samples were drawn and brains were collected after perfusion on 7 dpi.

(A) Slices of the OB were immunolabeled with antibodies directed against Iba-1 and Mac-3, and counterstained with DAPI, and immunofluorescence microscopy was performed.

(B) Quantitation of Iba-1<sup>+</sup> cells in the OB glomeruli in (A) (n = 4–6, N = 2, combined data).

(C) Representative flow cytometry data and quantitation for CSF-1R<sup>+</sup> monocytes in the blood (n = 7–8, N = 2, combined data).

(D) Representative flow cytometry data for immune cells present in the CNS.

(E) Quantitation of CD45<sup>low</sup>CD11b<sup>low</sup> and CD45<sup>hi</sup>CD11b<sup>hi</sup> events (black and red marked populations, respectively) in (D) (n = 4–6, N = 2, combined data).

(F) Virus titers in the OB, cerebrum (CB), cerebellum (CL), and brainstem (BS) (n = 10–11, N = 2, combined data).

(G) Survival of mice (n = 18–19 for VSV, n = 5 for PBS, N = 2, combined data). Data are shown as mean ± SEM. \*p < 0.05, \*\*p < 0.01. Scale bar in (A) is 200 μm.

such as *Tmem119*, *Sall1*, *P2ry12*, *Hexb*, *Fcrls*, *Siglech*, and *Cx3cr1* (Bennett et al., 2016; Butovsky et al., 2014; Buttgerit et al., 2016) were enriched in the CD45<sup>low</sup>CD11b<sup>low</sup> population from control animals but absent in the monocyte population (Figure 3E; Figure S3), confirming the identity of microglia. Interestingly, compared to CD45<sup>low</sup>CD11b<sup>low</sup> microglia from control animals, CD45<sup>low</sup>CD11b<sup>low</sup> microglia as well as CD45<sup>hi</sup>CD11b<sup>hi</sup>td-tomato<sup>+</sup> microglia from infected animals showed downregulation of all of these genes (Figure 3E; Figure S3). Infiltrating monocytes showed enhanced numbers of *Ccr2* transcripts compared to microglia. Additionally, these cells also showed higher expression of *Nos2* and *Cd86* transcripts (Figure 3E; Figure S3). Interestingly, microglia and monocytes from infected animals showed expression of the *Mki67* gene, which is associated with proliferation (Figure 3E). Together, these fluorescence-activated cell sorting (FACS) and RNA-seq studies confirm the presence of CD45<sup>hi</sup> microglia in the OB upon VSV infection and show that they are distinct from CD45<sup>low</sup> microglia in terms of their gene expression during CNS infection.

to arrest VSV spread via the olfactory route. BLZ945 treatment reduced the numbers of microglia in control animals as well as in VSV-infected animals as seen by immunohistology (Figures 4A and 4B). Depletion of microglia was also confirmed by flow cytometry analysis of CNS immune cells from control animals, which showed a significant decrease in the number of CD45<sup>low</sup>CD11b<sup>low</sup> cells in BLZ945 treated animals compared to controls (Figures 4D and 4E). Flow cytometry analysis of CNS immune cells from VSV-infected animals showed a significant decrease in the number of CD45<sup>low</sup>CD11b<sup>low</sup> cells, but not in CD45<sup>hi</sup>CD11b<sup>hi</sup> cells (Figures 4D and 4E). These data show that decreased accumulation of Iba-1<sup>+</sup> cells observed in immunohistology (Figures 4A and 4B) was due to depletion of microglia, and not due to the lack of infiltration of blood monocytes. Along with the major decrease in the number of microglia, we also observed a minute, but statistically significant, decrease in CD45<sup>hi</sup>CD11b<sup>hi</sup> cells, suggesting depletion of some perivascular and meningeal macrophages (Figures 4D and 4E). Staining of

### Accumulation of Microglia in the OB Is Essential for the Inhibition of Virus Spread

Previously, it was shown that oral treatment of mice with the brain-penetrant CSF-1R inhibitor BLZ945 resulted in depletion of microglia and addressed whether the accumulation of microglia was essential

CD11b and CSF-1R in blood cells (Figure 4C) and the presence of CD45<sup>hi</sup>CD11b<sup>hi</sup> cells in the CNS upon VSV infection (Figures 4D and 4E) showed that BLZ945 did not deplete blood monocytes or inhibit their accumulation in the CNS. CD86, CD206, and Ly6C expression of myeloid cells was comparable between vehicle- or BLZ945-treated animals, suggesting that BLZ945 treatment did not inhibit activation of myeloid cells (Figures S4A and S4B).

Next, the effect of microglia depletion on the spread of VSV into the brain was tested. Animals depleted of microglia showed enhanced presence of virus in the cerebrum and significantly more virus in the cerebellum and brainstem than vehicle-treated animals (Figure 4F). However, these animals did not show detectable virus in peripheral organs such as liver, lung, and spleen (Figure S4C). These data indicated a diminished restriction of virus spread from the OB to other brain regions upon microglia depletion. In accordance with enhanced virus spread, mice depleted of microglia showed higher lethality upon VSV infection than controls (Figure 4G). Thus, after i.n. VSV infection, microglia proliferation and accumulation within the OB was required to inhibit virus spread and to protect the CNS.

### IFNAR Signaling of Neurons and Astrocytes Is Required for Microglia Activation

To address whether IFNAR signaling of CNS resident cells, including microglia, was necessary to induce accumulation of activated Iba-1<sup>+</sup> cells, we used *Nes-cre<sup>+/-</sup>-IFNAR<sup>fl/fl</sup>* mice lacking IFNAR signaling selectively on the cells of the neuroectodermal lineage (Detje et al., 2009) and *CX3CR1-cre<sup>ER+/-</sup>-IFNAR<sup>fl/fl</sup>* mice after 8 weeks of tamoxifen treatment that lack IFNAR signaling selectively on long-lived CX3CR1<sup>+</sup> cells such as microglia (Lückoff et al., 2016). Analysis of Iba-1<sup>+</sup> cells in the OB of such uninfected mice showed a normal distribution of Iba-1<sup>+</sup> cells with long thin processes similar to WT control animals (Figure 5A; see Figure 1). Upon VSV infection, *CX3CR1-cre<sup>ER+/-</sup>-IFNAR<sup>fl/fl</sup>* mice showed increased numbers of Iba-1<sup>+</sup> cells comparable with WT animals on 6 dpi. In contrast, in infected *Nes-cre<sup>+/-</sup>-IFNAR<sup>fl/fl</sup>* mice, accumulation of Iba-1<sup>+</sup> cells was impaired at 4 and 6 dpi (Fig. 5A-C). However, Iba-1<sup>+</sup> cells did express Mac-3, which confirmed their activation (Figure 5A). Next, we analyzed the role of IFNAR signaling of astrocytes by using *GFAP-cre<sup>+/-</sup>-IFNAR<sup>fl/fl</sup>* mice. The astrocyte-specific cre expression in these mice was confirmed by the analysis of *GFAP-cre<sup>+/-</sup>-Rosa26eYFP<sup>St/Wt</sup>* reporter offspring, which showed YFP expression in astrocytes, but not in neurons (Figure S5). In *GFAP-cre<sup>+/-</sup>-IFNAR<sup>fl/fl</sup>* animals, VSV infection led to enhanced expression of Mac-3 on Iba-1<sup>+</sup> cells, but accumulation of Iba-1<sup>+</sup> cells was impaired at 4 and 6 dpi (Figures 5A-5C). Similarly, *Syn1-cre<sup>+/-</sup>-IFNAR<sup>fl/fl</sup>* animals lacking IFNAR signaling on neurons also showed many Iba-1<sup>+</sup> cells that stained positive for Mac-3 (Figure 5A), but accumulation of Iba-1<sup>+</sup> cells was also impaired upon VSV infection (Figures 5A and 5C).

In order to confirm the regulation of myeloid cell activation within the CNS by neurons and astrocytes, morphological analysis of Iba-1<sup>+</sup> cells within the glomeruli of the OB was performed. This analysis revealed that, upon VSV infection of WT animals, myeloid cells showed increased numbers of primary processes and branching. However, the lengths of individual processes

was decreased (Figures 6A and 6B), confirming activation of myeloid cells upon VSV infection. In accordance with the immunofluorescence data, myeloid cells from animals lacking IFNAR signaling on neurons or astrocytes showed a significantly diminished increase in the number of primary processes, and the length of the processes was also not significantly altered (Figures 6A and 6B), which suggested a lack of activation. In conclusion, these data confirmed that IFNAR signaling of neurons and astrocytes regulates the activation of myeloid cells that accumulate within CNS during viral encephalitis.

Histological analysis of Ki-67 expression showed the presence of proliferating Iba-1<sup>+</sup> cells in infected mice lacking IFNAR signaling on microglia, whereas mice lacking IFNAR signaling on astrocytes or neurons showed significantly decreased numbers of proliferating Iba-1<sup>+</sup> cells (Figures S6A and S6B). These data suggest an essential role of IFNAR signaling of neurons and astrocytes, but not of microglia, for the induction of microglia proliferation and accumulation in the OB of VSV-infected mice. Unlike WT mice, i.n. VSV-challenged mice lacking IFNAR signaling selectively in neurons or astrocytes showed presence of virus in different CNS regions at 4 dpi (Figure S7) and succumbed to VSV infection with similar kinetics as *Nes-cre<sup>+/-</sup>-IFNAR<sup>fl/fl</sup>* mice (Detje et al., 2009) (Figure 7A). These mice showed high viral titers in all parts of the brain, but not in the peripheral organs tested (Figures 7B-7G). Mice lacking IFNAR signaling of microglia survived the infection and had no detectable virus in any tissue tested, similar to WT animals (Figures 7A-7G). *IFNAR<sup>-/-</sup>* mice died on 3 dpi with high virus loads in all tissues tested (Figures 7A-7G). These data indicated that IFNAR signaling on neurons and astrocytes is essential for the control of VSV spread within the CNS via the olfactory route, whereas IFNAR signaling of microglia is dispensable.

### DISCUSSION

Little is known about the mechanisms that regulate myeloid cell activation and accumulation in the CNS during virus infection. Here, we found that upon i.n. VSV instillation activated myeloid cells, especially microglia, accumulated in the glomerular layer of the OB. Depletion of microglia during infection led to enhanced virus spread in the CNS and caused lethal encephalitis. This suggests that upon CNS virus infection microglia form an innate barrier in the OB that controls virus spread via the olfactory route. IFNAR signaling of neurons and astrocytes, but not of microglia, regulated the activation of myeloid cells, and IFNAR signaling of neurons had a stronger impact on activation than IFNAR signaling of astrocytes. This was also reflected by the number of accumulated myeloid cells in the OB, local proliferation of activated myeloid cells, and protection against virus spread into the CNS and subsequent lethal disease. Thus, our results highlight the relevance of cross talk among neurons, astrocytes, and microglia for the regulation of microglia activation and its protective role during CNS virus infection.

In this study, we focused on uncovering the regulation of activation of myeloid cell subsets within the CNS such as microglia during VSV encephalitis after i.n. infection, as they may affect viral control, recovery, and functioning of the CNS post-recovery (Vasek et al., 2016; Wheeler et al., 2018). On 6 dpi, there was



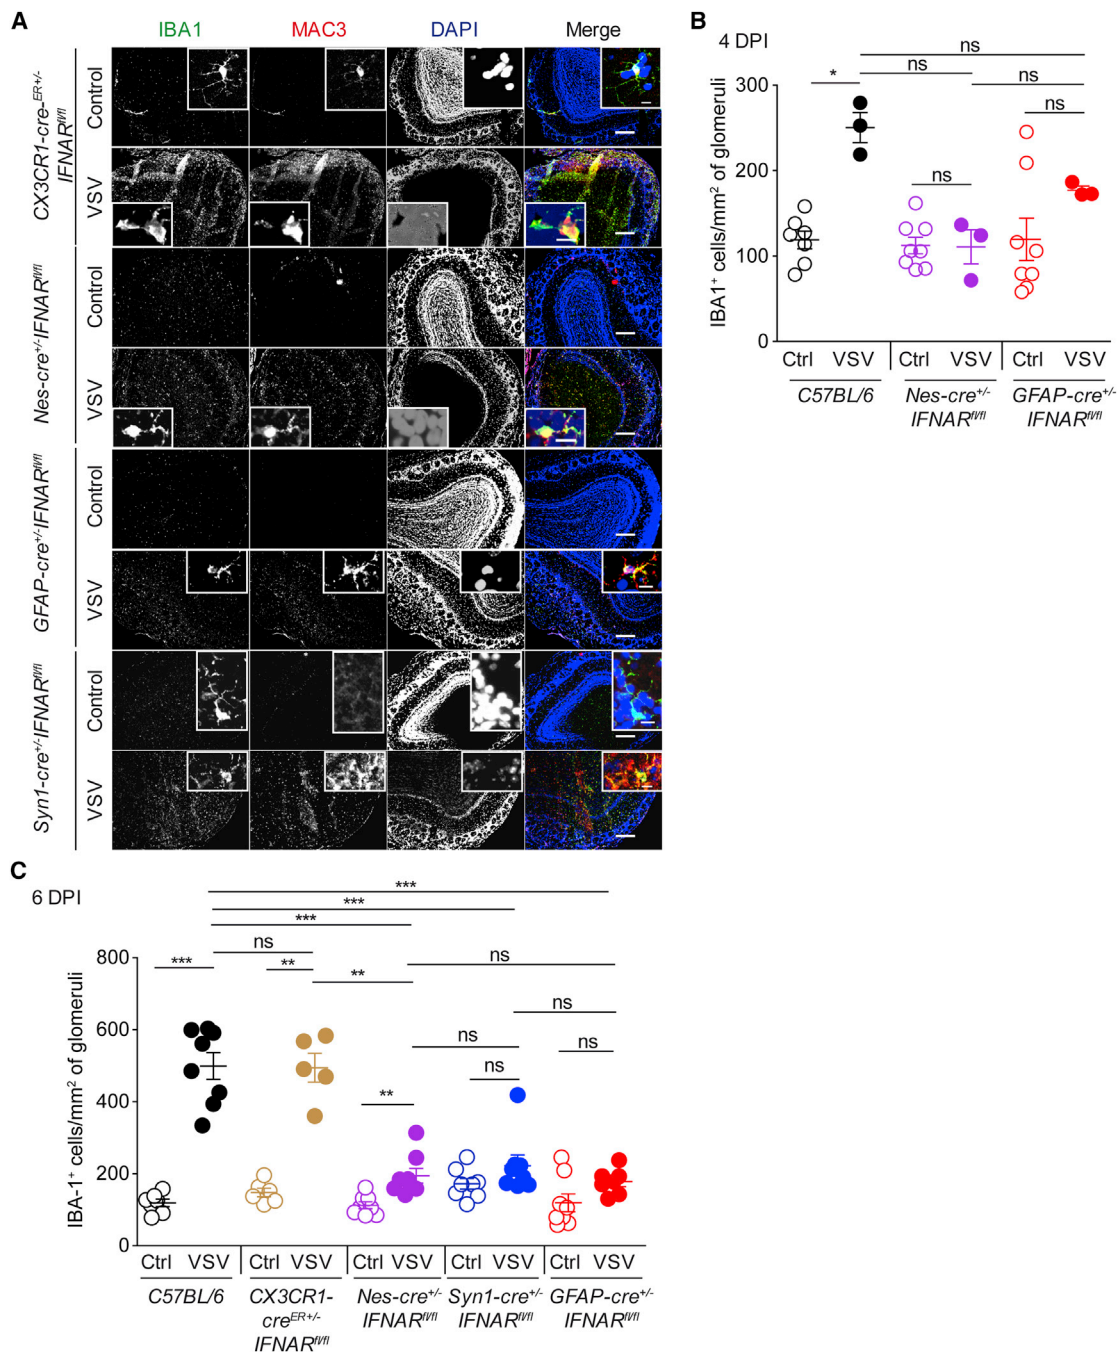

**Figure 5. IFNAR Signaling of Neurons and Astrocytes, but not Microglia, Is Required for Accumulation of Myeloid Cells in the OB**

Animals were treated, and brains were prepared on 4 or 6 dpi as described in Figure 1.

(A) OB slices were immunolabeled for Iba-1 and Mac-3, and counterstained with DAPI, and immunofluorescence microscopy was performed.

(B) Quantitation of Iba-1<sup>+</sup> cells in the OB glomeruli in (A) on 4 dpi (n = 3–8, N = 2, combined data). WT data are from Figure 1.

(C) Quantitation of Iba-1<sup>+</sup> cells in the OB glomeruli in (A) on 6 dpi (n = 5–8, N = 2, combined data). WT data are shown as mean ± SEM. \*p < 0.05, \*\*p < 0.005, \*\*\*p < 0.0005; ns, not significant. Scale bar in (A) is 200 μm for main panels and 10 μm for insets.

significant accumulation of activated proliferating microglia and infiltrating monocytes in the glomerular region of the OB as detected by immunohistology and verified by flow cytometry of genetically microglia marked mice. Light sheet microscopy of

whole intact OB of microglia marked mice showed that, upon i.n. VSV infection, microglia accumulated in the glomerular region of the whole OB. These 3D data were supported by immunohistology data that also showed accumulation of Iba-1<sup>+</sup> cells

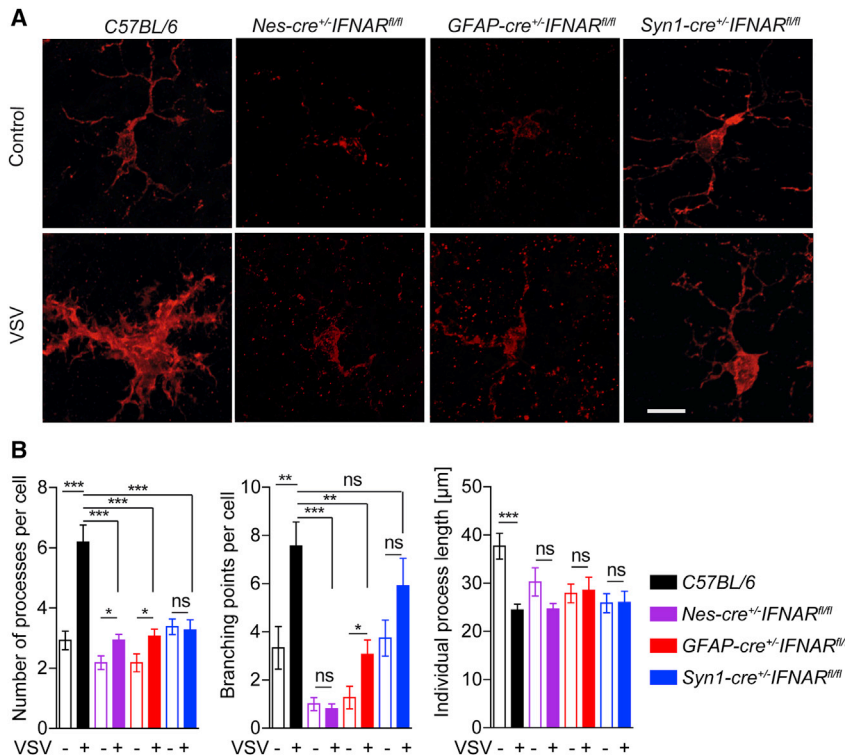

### Figure 6. IFNAR Signaling of Neurons and Astrocytes Regulates Activation of CNS Myeloid Cells

Animals were treated and brains were prepared on 6 dpi as described in Figure 1 for cryosectioning.

(A) OB slices were immunolabeled for Iba-1 and analyzed by confocal microscopy. Representative images of Iba-1<sup>+</sup> myeloid cells from WT animals and from animals lacking IFNAR signaling on different CNS cell subsets.

(B) Quantification of numbers of primary processes, branching points, and process lengths of Iba-1<sup>+</sup> myeloid cells (n = 10–28 cells from two to three animals per genotype, combined data). Data are shown as mean ± SEM. \*\*p < 0.005, \*\*\*p < 0.0005; ns, not significant. Scale bar in (A) is 10 μm.

in the glomerular region of the OB. It was previously shown that VSV is arrested in the glomerular region of the OB (Detje et al., 2009). A similar observation was made in the VSV infection model for brain DC, in which CD11c-YFP mice were used to study the dynamics of DC in the OB after VSV infection. In that study, also accumulation of Iba-1<sup>+</sup>CD11c<sup>+</sup> cells was detected, which the authors defined as DC (D'Agostino et al., 2012). However, it is possible that a part of these CD11c<sup>+</sup> cells in fact were microglia, as recently it has been shown that microglia also express CD11c during neuroinflammation (Greter et al., 2015). In our study also the accumulation of Iba-1<sup>+</sup> cells was detected at 4 dpi and continued at 6 dpi. Together, these data suggest that the OB is the site of immune response during pathogen entry via the olfactory route.

Although microglia express lower CD45 levels than infiltrating monocytes, it is proposed that during CNS inflammation activated microglia upregulate CD45 expression and thus solely based on CD45 expression become indistinguishable from infiltrating monocytes (Ajami et al., 2011; Greter et al., 2015; Yamasaki et al., 2014). Using genetically microglia marked mice, we found that upon CNS virus infection some microglia shifted to the CD45<sup>hi</sup> population, which we also confirmed by Tmem119 expression analysis and flow cytometry. Since microglia have been implemented to play a detrimental role in the long-term complications of encephalitis (Vasek et al., 2016), observation of two distinct microglia populations (CD45<sup>low</sup> and CD45<sup>hi</sup>) and infiltrating monocytes motivated us to characterize these cells in greater detail. Analysis of gene expression via RNA-seq of sorted myeloid cells from the OB showed that both microglia and monocytes had distinct gene expression profiles.

Infection and associated responses led to extensive changes in microglia gene expression. Although both microglia and monocytes showed IFNAR stimulation as indicated by abundant induction of interferon-stimulated genes (ISGs), which are expressed upon IFNAR stimulation and have many antiviral functions, and genes involved in antigen processing and presentation, there were still significant differences in gene expression profiles of the different subpopulations. Microglia from uninfected animals showed high expression of many microglia-specific genes. While microglia-specific function of Tmem119 is not known yet, Sall1 has been identified as a negative regulator of microglia activation (Buttgereit et al., 2016). Interestingly, Sall1 was downregulated in microglia from infected animals. Thus, presumably Sall1 expression is regulated by neuro-glial cross talk during CNS infection.

We hypothesized that accumulation of microglia in the glomerular region of the OB was an innate immune defense mechanism that restricted virus spread via the olfactory route. In order to experimentally address this, we depleted microglia using a pharmacological method (Pyonteck et al., 2013) in animals i.n. instilled with VSV. This allowed depletion of microglia with high efficiency, although there was also a very minor depletion of PVMs. However, the number of blood monocytes and the accumulation of CD45<sup>hi</sup>CD11b<sup>hi</sup> cells in the CNS upon VSV infection did not differ between vehicle- and BLZ945-treated animals. For microglial maintenance, IL-34 is required and it acts as the ligand for CSF-1R, whereas CSF-1 is the ligand for monocyte development (Greter et al., 2012). Thus, specific microglia depletion could be achieved by BLZ945 inhibiting the interaction of CSF-1R with IL-34, but not with CSF-1. Increased spread and presence of virus in the brain after microglia depletion suggest that accumulated microglia in the OB provide an innate immune shield against virus entry via the olfactory route. Theoretically, it could also be possible that the enhanced virus spread in the CNS was due to the small decrease in the number of PVMs, and not due to the large decrease in the number microglia in the CNS parenchyma. However, since on 7 dpi there is no

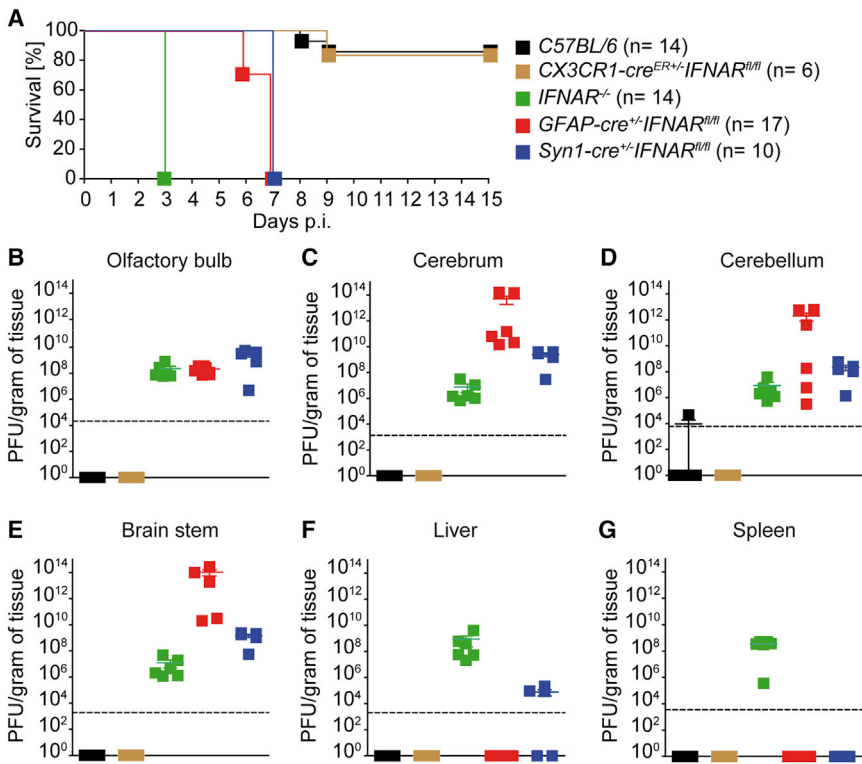

**Figure 7. IFNAR Signaling of Neurons and Astrocytes, but Not of Microglia, Is Essential for Survival of VSV CNS Infection**

(A) Survival of animals after i.n. infection with 1,000 PFU of VSV (n = 6–14, N ≥ 2, combined data). (B–G) Viral titers of (B) OB, (C) cerebrum, (D) cerebellum, (E) brainstem, (F) liver, and (G) spleen at the time of death or 15 dpi for surviving animals (n ≥ 3, N ≥ 2, representative data). Data are shown as mean ± SEM.

is in contrast to the study by Nayak et al., in which it was proposed that IFNAR signaling of myeloid cells was essential for their full activation and dynamics of accumulation. One of the possible reasons for the lack of microglial activation and accumulation in mice with a selective IFNAR deletion on astrocytes or neurons could be high viral titers in the CNS. Nevertheless, we would like to point out that, in all of the animals, virus is present in the OB and therefore microglia from WT animals are also exposed to high amounts of virus at least early after infection. Thus, the lack of microglia activation seen in the animals lacking IFNAR

difference in the viral titers in the OB of vehicle- or BLZ945-treated animals, it is very likely that after i.n. infection not the viral entry into the CNS, but the spread of the virus in the CNS was enhanced. Similar observations were also made in other studies where depletion of microglia led to enhanced virus and lethality after coronavirus and flavivirus infections (Seitz et al., 2018; Wheeler et al., 2018). Notably, in the study by Wheeler et al., there was depletion of PVMs. However, in our as well as their study, the decrease in the numbers of PVM is very minor compared with the decrease in the number of microglia. Since the spread of the virus within the CNS is enhanced and not the entry in the CNS, it can be concluded that microglia are responsible for inhibition of virus spread within the CNS. Peripheral organs of these animals did not show detectable virus, indicating that inhibition of CSF-1R did not induce general immune suppression. Thus, our data show a direct antiviral role of microglia after viral entry via the i.n. route.

Studies have shown that IFNAR signaling within the CNS plays an essential role in regulating innate myeloid cell dynamics and immune response (Nayak et al., 2013; Prinz et al., 2008). However, the role of different CNS cell types in regulating myeloid cell activation during viral encephalitis has not been addressed in depth. Therefore, we focused on investigating this aspect in our model of VSV encephalitis after i.n. infection. Lack of Iba-1<sup>+</sup> cell proliferation, accumulation, and activation-associated cellular morphology in animals lacking IFNAR signaling of neurons or astrocytes, but not microglia, suggest a model in which the IFN-β produced within the OB acts on neurons and astrocytes and type I IFN stimulation-induced changes in neurons and astrocytes regulate microglia functions and phenotype. This

signaling of neurons and astrocytes is due to abrogated neuron-astrocyte-microglia communication.

Survival experiments with animals lacking IFNAR signaling on different cell subsets of the CNS further established that IFNAR triggering of neurons and astrocytes was essential for survival, whereas IFNAR signaling of microglia was dispensable. The lack of Iba-1<sup>+</sup> cell accumulation and death of animals lacking IFNAR signaling on neurons or astrocytes due to encephalitis further implied an important role of microglia accumulation in restricting virus spread via the olfactory route.

In conclusion, our data indicate that upon viral infection via the i.n. route CNS-resident microglia get activated and constitute an early innate barrier in the OB against virus spread within the CNS. Formation of this innate barrier is regulated by IFNAR signaling of neurons and astrocytes and is independent of IFNAR signaling of microglia. Our data unveil a mechanism in the communication between astrocytes, neurons, and microglia during viral encephalitis that restricts viral CNS infiltration via the olfactory route.

## STAR★METHODS

Detailed methods are provided in the online version of this paper and include the following:

- [KEY RESOURCES TABLE](#)
- [CONTACT FOR REAGENT AND RESOURCE SHARING](#)
- [EXPERIMENTAL MODELS AND SUBJECT DETAILS](#)
  - Animals, tamoxifen and BrdU treatment
  - i.n. VSV infection

- Cell lines
- Virus
- **METHOD DETAILS**
  - VSV preparation and plaque assay
  - Perfusion of mice
  - Immunofluorescence microscopy
  - Confocal microscopy and image analysis
  - Tissue clearance and 3D imaging
  - BLZ945 treatment
  - Isolation of CNS immune cells, flow cytometry and sorting
- **QUANTIFICATION AND STATISTICAL ANALYSIS**
- **DATA AVAILABILITY**

## SUPPLEMENTAL INFORMATION

Supplemental Information includes seven figures and two videos and can be found with this article online at <https://doi.org/10.1016/j.celrep.2018.09.003>.

## ACKNOWLEDGMENTS

We would like to thank Andreas Pavlou for help with microglia depletion experiments. This study was supported by a bilateral project of the German Center for Neurodegenerative Diseases and the Helmholtz Centre for Infection Research (to F.B., M.S., and U.K.), the Helmholtz Zukunftsthema “Immunology & Inflammation” (ZT-0027) (to U.K.), and the Niedersachsen-Research Network on Neuroinfectology (N-RENNT) of the Ministry of Science and Culture of Lower Saxony, Germany (to M.S. and U.K.). M.P. is supported by the DFG (SFB/TRR167 “NeuroMac”). We would like to acknowledge the assistance of the Cell Sorting Core Facility of the Hannover Medical School supported in part by Braukmann-Wittenberg-Herz-Stiftung and DFG.

## AUTHOR CONTRIBUTIONS

C.C. designed and performed all experiments, analyzed data, and wrote the paper. C.N.D. performed plaque assays and survival experiments. E.G. performed and contributed to flow cytometry experiments. K.B. contributed to flow cytometry and sorting, microglia depletion experiments, and data analysis. J. Spanier and L.G. contributed to microglia depletion experiments. D.A.E. performed light sheet microscopy. M.J.C.J. performed RNA-seq analysis of microglia. N.M. and M.A.K. performed morphological analysis of microglia. J. Sutton provided BLZ945. C.K.P. contributed to flow cytometry experiments and data analysis. V.G. contributed to immunofluorescence microscopy experiments and data analysis. M.P. provided the *CX3CR1-cre<sup>ERT2/+</sup>* mouse, provided funding for RNA-seq analysis of microglia, contributed to data discussion, suggested experiments, and provided critical insights. F.B. provided *td-tomato<sup>St/St</sup>* mouse, contributed to light sheet microscopy data, and secured funding. M.S. and U.K. conceived the idea, secured funding, designed experiments, discussed data, and wrote the paper.

## DECLARATION OF INTERESTS

The authors declare no competing interests.

Received: September 25, 2017

Revised: June 6, 2018

Accepted: August 30, 2018

Published: October 2, 2018

## REFERENCES

Ajami, B., Bennett, J.L., Krieger, C., McNagny, K.M., and Rossi, F.M. (2011). Infiltrating monocytes trigger EAE progression, but do not contribute to the resident microglia pool. *Nat. Neurosci.* *14*, 1142–1149.

Anders, S., Pyl, P.T., and Huber, W. (2015). HTSeq—a Python framework to work with high-throughput sequencing data. *Bioinformatics* *31*, 166–169.

Andrews (2010). FastQC: a quality control tool for high throughput sequence data. <http://www.bioinformatics.babraham.ac.uk/projects/fastqc/>.

Bajenaru, M.L., Zhu, Y., Hedrick, N.M., Donahoe, J., Parada, L.F., and Gutmann, D.H. (2002). Astrocyte-specific inactivation of the neurofibromatosis 1 gene (NF1) is insufficient for astrocytoma formation. *Mol. Cell. Biol.* *22*, 5100–5113.

Bennett, M.L., Bennett, F.C., Liddel, S.A., Ajami, B., Zamanian, J.L., Fernhoff, N.B., Mulinyawe, S.B., Bohlen, C.J., Adil, A., Tucker, A., et al. (2016). New tools for studying microglia in the mouse and human CNS. *Proc. Natl. Acad. Sci. USA* *113*, E1738–E1746.

Butovsky, O., Jedrychowski, M.P., Moore, C.S., Cialic, R., Lanser, A.J., Gabrieli, G., Koeglsperger, T., Dake, B., Wu, P.M., Doykan, C.E., et al. (2014). Identification of a unique TGF- $\beta$ -dependent molecular and functional signature in microglia. *Nat. Neurosci.* *17*, 131–143.

Buttgereit, A., Lelios, I., Yu, X., Vrohligs, M., Krakoski, N.R., Gautier, E.L., Nishinakamura, R., Becher, B., and Greter, M. (2016). Sall1 is a transcriptional regulator defining microglia identity and function. *Nat. Immunol.* *17*, 1397–1406.

Chauhan, V.S., Furr, S.R., Sterka, D.G., Jr., Nelson, D.A., Moerdyk-Schawecker, M., Marriott, I., and Grzelishvili, V.Z. (2010). Vesicular stomatitis virus infects resident cells of the central nervous system and induces replication-dependent inflammatory responses. *Virology* *400*, 187–196.

D’Agostino, P.M., Kwak, C., Vecchiarelli, H.A., Toth, J.G., Miller, J.M., Mashaheb, Z., McEwen, B.S., and Bulloch, K. (2012). Viral-induced encephalitis initiates distinct and functional CD103<sup>+</sup> CD11b<sup>+</sup> brain dendritic cell populations within the olfactory bulb. *Proc. Natl. Acad. Sci. USA* *109*, 6175–6180.

Daniels, B.P., Jujjavarapu, H., Durrant, D.M., Williams, J.L., Green, R.R., White, J.P., Lazear, H.M., Gale, M., Jr., Diamond, M.S., and Klein, R.S. (2017). Regional astrocyte IFN signaling restricts pathogenesis during neurotropic viral infection. *J. Clin. Invest.* *127*, 843–856.

Detje, C.N., Meyer, T., Schmidt, H., Kreuz, D., Rose, J.K., Bechmann, I., Prinz, M., and Kalinke, U. (2009). Local type I IFN receptor signaling protects against virus spread within the central nervous system. *J. Immunol.* *182*, 2297–2304.

Detje, C.N., Lienenklaus, S., Chhatbar, C., Spanier, J., Prajeeth, C.K., Soldner, C., Tovey, M.G., Schlüter, D., Weiss, S., Stangel, M., and Kalinke, U. (2015). Upon intranasal vesicular stomatitis virus infection, astrocytes in the olfactory bulb are important interferon Beta producers that protect from lethal encephalitis. *J. Virol.* *89*, 2731–2738.

Ertürk, A., and Bradke, F. (2013). High-resolution imaging of entire organs by 3-dimensional imaging of solvent cleared organs (3DISCO). *Exp. Neurol.* *242*, 57–64.

Ertürk, A., Mauch, C.P., Hellal, F., Förstner, F., Keck, T., Becker, K., Jährling, N., Steffens, H., Richter, M., Hübener, M., et al. (2011). Three-dimensional imaging of the unsectioned adult spinal cord to assess axon regeneration and glial responses after injury. *Nat. Med.* *18*, 166–171.

Getts, D.R., Terry, R.L., Getts, M.T., Müller, M., Rana, S., Shrestha, B., Radford, J., Van Rooijen, N., Campbell, I.L., and King, N.J. (2008). Ly6c<sup>+</sup> “inflammatory monocytes” are microglial precursors recruited in a pathogenic manner in West Nile virus encephalitis. *J. Exp. Med.* *205*, 2319–2337.

Ginhoux, F., Greter, M., Leboeuf, M., Nandi, S., See, P., Gokhan, S., Mehler, M.F., Conway, S.J., Ng, L.G., Stanley, E.R., et al. (2010). Fate mapping analysis reveals that adult microglia derive from primitive macrophages. *Science* *330*, 841–845.

Goldmann, T., Wieghofer, P., Müller, P.F., Wolf, Y., Varol, D., Yona, S., Brendecker, S.M., Kierdorf, K., Staszewski, O., Datta, M., et al. (2013). A new type of microglia gene targeting shows TAK1 to be pivotal in CNS autoimmune inflammation. *Nat. Neurosci.* *16*, 1618–1626.

Goldmann, T., Wieghofer, P., Jordão, M.J., Prutek, F., Hagemeyer, N., Frenzel, K., Amann, L., Staszewski, O., Kierdorf, K., Krueger, M., et al. (2016). Origin, fate and dynamics of macrophages at central nervous system interfaces. *Nat. Immunol.* *17*, 797–805.

- Greter, M., Lelios, I., Pelczar, P., Hoeffel, G., Price, J., Leboeuf, M., Kündig, T.M., Frei, K., Ginhoux, F., Merad, M., and Becher, B. (2012). Stroma-derived interleukin-34 controls the development and maintenance of langerhans cells and the maintenance of microglia. *Immunity* 37, 1050–1060.
- Greter, M., Lelios, I., and Croxford, A.L. (2015). Microglia versus myeloid cell nomenclature during brain inflammation. *Front. Immunol.* 6, 249.
- Hoffmann, M., Wu, Y.J., Gerber, M., Berger-Rentsch, M., Heimrich, B., Schwemmler, M., and Zimmer, G. (2010). Fusion-active glycoprotein G mediates the cytotoxicity of vesicular stomatitis virus M mutants lacking host shut-off activity. *J. Gen. Virol.* 91, 2782–2793.
- Hwang, M., and Bergmann, C.C. (2018). Alpha/beta interferon (IFN- $\alpha/\beta$ ) in astrocytes mediates protection against viral encephalomyelitis and regulates IFN- $\gamma$ -dependent responses. *J. Virol.* 92, e01901-17.
- John, C.C., Carabin, H., Montano, S.M., Bangirana, P., Zunt, J.R., and Peterson, P.K. (2015). Global research priorities for infections that affect the nervous system. *Nature* 527, S178–S186.
- Kalinke, U., Bechmann, I., and Detje, C.N. (2011). Host strategies against virus entry via the olfactory system. *Virulence* 2, 367–370.
- Kamphuis, E., Junt, T., Waibler, Z., Forster, R., and Kalinke, U. (2006). Type I interferons directly regulate lymphocyte recirculation and cause transient blood lymphopenia. *Blood* 108, 3253–3261.
- Kierdorf, K., Erny, D., Goldmann, T., Sander, V., Schulz, C., Perdiguero, E.G., Wieghofer, P., Heinrich, A., Riemke, P., Hölscher, C., et al. (2013). Microglia emerge from erythromyeloid precursors via Pu.1- and Irf8-dependent pathways. *Nat. Neurosci.* 16, 273–280.
- Koyuncu, O.O., Hogue, I.B., and Enquist, L.W. (2013). Virus infections in the nervous system. *Cell Host Microbe* 13, 379–393.
- Longair, M.H., Baker, D.A., and Armstrong, J.D. (2011). Simple Neurite Tracer: open source software for reconstruction, visualization and analysis of neuronal processes. *Bioinformatics* 27, 2453–2454.
- Love, M.I., Huber, W., and Anders, S. (2014). Moderated estimation of fold change and dispersion for RNA-seq data with DESeq2. *Genome Biol.* 15, 550.
- Lückoff, A., Caramoy, A., Scholz, R., Prinz, M., Kalinke, U., and Langmann, T. (2016). Interferon-beta signaling in retinal mononuclear phagocytes attenuates pathological neovascularization. *EMBO Mol. Med.* 8, 670–678.
- Lundh, B., Kristensson, K., and Norrby, E. (1987). Selective infections of olfactory and respiratory epithelium by vesicular stomatitis and Sendai viruses. *Neuropathol. Appl. Neurobiol.* 13, 111–122.
- Madisen, L., Zwingman, T.A., Sunkin, S.M., Oh, S.W., Zariwala, H.A., Gu, H., Ng, L.L., Palmiter, R.D., Hawrylycz, M.J., Jones, A.R., et al. (2010). A robust and high-throughput Cre reporting and characterization system for the whole mouse brain. *Nat. Neurosci.* 13, 133–140.
- Mrdjen, D., Pavlovic, A., Hartmann, F.J., Schreiner, B., Utz, S.G., Leung, B.P., Lelios, I., Heppner, F.L., Kipnis, J., Merkler, D., et al. (2018). High-dimensional single-cell mapping of central nervous system immune cells reveals distinct myeloid subsets in health, aging, and disease. *Immunity* 48, 380–395.e6.
- Müller, U., Steinhoff, U., Reis, L.F., Hemmi, S., Pavlovic, J., Zinkernagel, R.M., and Aguet, M. (1994). Functional role of type I and type II interferons in antiviral defense. *Science* 264, 1918–1921.
- Nayak, D., Johnson, K.R., Heydari, S., Roth, T.L., Zinselmeier, B.H., and McGavern, D.B. (2013). Type I interferon programs innate myeloid dynamics and gene expression in the virally infected nervous system. *PLoS Pathog.* 9, e1003395.
- Nayak, D., Roth, T.L., and McGavern, D.B. (2014). Microglia development and function. *Annu. Rev. Immunol.* 32, 367–402.
- Pfefferkorn, C., Kalfass, C., Lienenklaus, S., Spanier, J., Kalinke, U., Rieder, M., Conzelmann, K.K., Michiels, T., and Staeheli, P. (2015). Abortively infected astrocytes appear to represent the main source of interferon beta in the virus-infected brain. *J. Virol.* 90, 2031–2038.
- Preibisch, S., Saalfeld, S., and Tomancak, P. (2009). Globally optimal stitching of tiled 3D microscopic image acquisitions. *Bioinformatics* 25, 1463–1465.
- Prinz, M., and Priller, J. (2014). Microglia and brain macrophages in the molecular age: from origin to neuropsychiatric disease. *Nat. Rev. Neurosci.* 15, 300–312.
- Prinz, M., Schmidt, H., Mildner, A., Knobloch, K.P., Hanisch, U.K., Raasch, J., Merkler, D., Detje, C., Gutcher, I., Mages, J., et al. (2008). Distinct and nonredundant in vivo functions of IFNAR on myeloid cells limit autoimmunity in the central nervous system. *Immunity* 28, 675–686.
- Pyonteck, S.M., Akkari, L., Schuhmacher, A.J., Bowman, R.L., Sevenich, L., Quail, D.F., Olson, O.C., Quick, M.L., Huse, J.T., Teijeiro, V., et al. (2013). CSF-1R inhibition alters macrophage polarization and blocks glioma progression. *Nat. Med.* 19, 1264–1272.
- Ransohoff, R.M., and Cardona, A.E. (2010). The myeloid cells of the central nervous system parenchyma. *Nature* 468, 253–262.
- Reiss, C.S., Plakhov, I.V., and Komatsu, T. (1998). Viral replication in olfactory receptor neurons and entry into the olfactory bulb and brain. *Ann. N Y Acad. Sci.* 855, 751–761.
- Sadek, J.R., Pergam, S.A., Harrington, J.A., Echevarria, L.A., Davis, L.E., Goade, D., Harnar, J., Nofchissey, R.A., Sewell, C.M., Ettestad, P., and Haaland, K.Y. (2010). Persistent neuropsychological impairment associated with West Nile virus infection. *J. Clin. Exp. Neuropsychol.* 32, 81–87.
- Schulz, C., Gomez Perdiguero, E., Chorro, L., Szabo-Rogers, H., Cagnard, N., Kierdorf, K., Prinz, M., Wu, B., Jacobsen, S.E., Pollard, J.W., et al. (2012). A lineage of myeloid cells independent of Myb and hematopoietic stem cells. *Science* 336, 86–90.
- Seitz, S., Clarke, P., and Tyler, K.L. (2018). Pharmacologic depletion of microglia increases viral load in the brain and enhances mortality in murine models of Flavivirus-induced encephalitis. *J. Virol.* 92, e00525-18.
- Skripuletz, T., Salinas Tejedor, L., Prajeeth, C.K., Hansmann, F., Chhatbar, C., Kucman, V., Zhang, N., Raddatz, B.B., Detje, C.N., Sühs, K.W., et al. (2015). The antiviral drug ganciclovir does not inhibit microglial proliferation and activation. *Sci. Rep.* 5, 14935.
- Srinivas, S., Watanabe, T., Lin, C.S., William, C.M., Tanabe, Y., Jessell, T.M., and Costantini, F. (2001). Cre reporter strains produced by targeted insertion of EYFP and ECFP into the ROSA26 locus. *BMC Dev. Biol.* 1, 4.
- Steel, C.D., Hahto, S.M., and Ciavarra, R.P. (2009). Peripheral dendritic cells are essential for both the innate and adaptive antiviral immune responses in the central nervous system. *Virology* 387, 117–126.
- Susaki, E.A., Tainaka, K., Perrin, D., Yukinaga, H., Kuno, A., and Ueda, H.R. (2015). Advanced CUBIC protocols for whole-brain and whole-body clearing and imaging. *Nat. Protoc.* 10, 1709–1727.
- Tronche, F., Kellendonk, C., Kretz, O., Gass, P., Anlag, K., Orban, P.C., Bock, R., Klein, R., and Schütz, G. (1999). Disruption of the glucocorticoid receptor gene in the nervous system results in reduced anxiety. *Nat. Genet.* 23, 99–103.
- van Riel, D., Verdijk, R., and Kuiken, T. (2015). The olfactory nerve: a shortcut for influenza and other viral diseases into the central nervous system. *J. Pathol.* 235, 277–287.
- Vasek, M.J., Garber, C., Dorsey, D., Durrant, D.M., Bollman, B., Soung, A., Yu, J., Perez-Torres, C., Frouin, A., Wilton, D.K., et al. (2016). A complement-microglial axis drives synapse loss during virus-induced memory impairment. *Nature* 534, 538–543.
- Wheeler, D.L., Sariol, A., Meyerholz, D.K., and Perlman, S. (2018). Microglia are required for protection against lethal coronavirus encephalitis in mice. *J. Clin. Invest.* 128, 931–943.
- Yamasaki, R., Lu, H., Butovsky, O., Ohno, N., Rietsch, A.M., Cialic, R., Wu, P.M., Doykan, C.E., Lin, J., Cotleur, A.C., et al. (2014). Differential roles of microglia and monocytes in the inflamed central nervous system. *J. Exp. Med.* 211, 1533–1549.
- Zhu, Y., Romero, M.I., Ghosh, P., Ye, Z., Charnay, P., Rushing, E.J., Marth, J.D., and Parada, L.F. (2001). Ablation of NF1 function in neurons induces abnormal development of cerebral cortex and reactive gliosis in the brain. *Genes Dev.* 15, 859–876.

## STAR★METHODS

### KEY RESOURCES TABLE

| REAGENT or RESOURCE                                             | SOURCE                                            | IDENTIFIER                        |
|-----------------------------------------------------------------|---------------------------------------------------|-----------------------------------|
| <b>Antibodies</b>                                               |                                                   |                                   |
| Anti-Ionized calcium-binding adaptor molecule 1 (Iba-1), Rabbit | Wako                                              | Cat# 019-19741; RRID: AB_839504   |
| Anti-Mac-3, Rat                                                 | BD PharMingen                                     | Cat# 550292; RRID: AB_393587      |
| Anti-Ki67, mouse                                                | BD PharMingen                                     | Cat# 550609; RRID: AB_393778      |
| Anti- $\beta$ -Tubulin III, mouse                               | Sigma                                             | Cat# T5076-200UL; RRID: AB_532291 |
| Anti-GFAP                                                       | DAKO                                              | Cat# Z0334; RRID: AB_10013382     |
| Anti-mouse IgG (H+L; DyLight 594), Goat                         | Thermo Fisher Scientific                          | Cat# 35510; RRID: AB_1185569      |
| Anti-rabbit Alexa Fluor 568, Goat                               | Thermo Fisher Scientific                          | Cat# A-11011; RRID: AB_143157     |
| Anti-rabbit Alexa Fluor 488, Goat                               | Thermo Fisher Scientific                          | Cat# A-11008; RRID: AB_143165     |
| Anti-rat Alexa Fluor 555, Goat                                  | Thermo Fisher Scientific                          | Cat# A-21434; RRID: AB_2535855    |
| Anti-rabbit Alexa Fluor, 647                                    | Thermo Fisher Scientific                          | Cat# A-31573; RRID: AB_2536183    |
| Anti-CD45.2 Pacific blue                                        | Biolegend                                         | Cat# 109820; RRID: AB_492872      |
| Anti-CD86 PE-Cy5                                                | Biolegend                                         | Cat# 105016; RRID: AB_493602      |
| Anti-CD206 PE-Cy7                                               | Biolegend                                         | Cat# 141720; RRID: AB_2562248     |
| Anti-Ly6C Alexafluor700                                         | Biolegend                                         | Cat# 128023; RRID: AB_10643270    |
| Anti-CX3CR1 Brilliant violet 510                                | Biolegend                                         | Cat# 149025; RRID: AB_2565707     |
| Anti-Ly6G PE-Cy7                                                | Biolegend                                         | Cat# 127617; RRID: AB_1877261     |
| Anti-CD11b APC-Cy7                                              | BD pharmingen                                     | Cat# 557657; RRID: AB_396772      |
| Anti-Tmem119, Rabbit                                            | Abcam                                             | Cat# Ab210405; RRID: AB_2744673   |
| DAPI                                                            | Sigma                                             | Cat# D9542                        |
| <b>Viruses</b>                                                  |                                                   |                                   |
| VSV-Indiana (Mudd-Summers isolate)                              | D. Kolakofsky (University of Geneva, Switzerland) | N/A                               |
| VSV-eGFP                                                        | Gert Zimmer, (University of Bern, Switzerland)    | N/A                               |
| <b>Chemicals</b>                                                |                                                   |                                   |
| BLZ945                                                          | Novartis                                          | N/A                               |
| Tamoxifen                                                       | Sigma                                             | Cat# T5648-5G                     |
| BrdU                                                            | Invitrogen                                        | Cat# 00-0103                      |
| Captisol®                                                       | Captisol                                          | Cat# RC-0C7-100                   |
| Percoll                                                         | Sigma                                             | Cat# P1644-500ML                  |
| Collagenase from Clostridium histolyticum                       | Sigma                                             | Cat# C9263-500MG                  |
| rDNase                                                          | MACHERY-NAGEL                                     | Ref# 740963                       |
| <b>Critical commercial kits</b>                                 |                                                   |                                   |
| Neural tissue digestion kit (p)                                 | Miltenyi Biotec                                   | Cat# 130-092-628                  |
| APC BrdU Flow Kit                                               | BD biosciences                                    | Cat# 552598                       |
| <b>Deposited Data</b>                                           |                                                   |                                   |
| RAW data files for RNA-seq                                      | NCBI Gene Expression Omnibus                      | GEO: GSE110188                    |
| <b>Experimental models: Cell lines</b>                          |                                                   |                                   |
| Vero cells                                                      | ATCC®                                             | Cat# CRL-1586                     |
| BHK-21 cells                                                    | ATCC®                                             | Cat# CCL-10                       |
| <b>Experimental Models: Organisms/strains</b>                   |                                                   |                                   |
| Mouse: C57BL/6J OlaHsd also referred to as WT                   | Harlan-Winkelmann or Janvier                      | Cat# 057 (H-W)                    |
| Mouse: IFNAR <sup>-/-</sup>                                     | Kamphuis et al., 2006                             | N/A                               |

(Continued on next page)

**Continued**

| REAGENT or RESOURCE                   | SOURCE                 | IDENTIFIER                                                                                                            |
|---------------------------------------|------------------------|-----------------------------------------------------------------------------------------------------------------------|
| Mouse: IFNAR <sup>fl/fl</sup>         | Kamphuis et al., 2006  | N/A                                                                                                                   |
| Mouse: Nes-cre <sup>+/-</sup>         | The Jackson Laboratory | Cat# 003771                                                                                                           |
| Mouse: Syn1-cre <sup>+/-</sup>        | The Jackson Laboratory | Cat# 003966                                                                                                           |
| Mouse: GFAP-cre <sup>+/-</sup>        | NCI Mouse Repository   | Cat# 01XN3                                                                                                            |
| Mouse: CX3CR1-cre <sup>-ER+/-</sup>   | The Jackson Laboratory | Cat# 020940                                                                                                           |
| Mouse: Rosa26eYFP <sup>St/St</sup>    | The Jackson Laboratory | Cat# 006148                                                                                                           |
| Mouse: td-tomato <sup>St/St</sup>     | The Jackson Laboratory | Cat# 007909                                                                                                           |
| <b>Softwares</b>                      |                        |                                                                                                                       |
| GraphPad Prism Version 5.0            | GraphPad software      | <a href="https://www.graphpad.com/scientific-software/prism/">https://www.graphpad.com/scientific-software/prism/</a> |
| FlowJo                                | FlowJo LLC             | <a href="https://www.flowjo.com/solutions/flowjo/">https://www.flowjo.com/solutions/flowjo/</a>                       |
| ImageJ and Plugins                    | NIH                    | <a href="https://imagej.nih.gov/ij/">https://imagej.nih.gov/ij/</a>                                                   |
| FiJi and Simple Neurite Tracer Plugin | NIH                    | <a href="https://imagej.net/Downloads">https://imagej.net/Downloads</a>                                               |
| Imaris                                | Bitplane AG            | <a href="http://www.bitplane.com/download">http://www.bitplane.com/download</a>                                       |

**CONTACT FOR REAGENT AND RESOURCE SHARING**

Further information and requests for resources and reagents should be directed to and will be fulfilled by the Lead Contact, Ulrich Kalinke ([ulrich.kalinke@twincore.de](mailto:ulrich.kalinke@twincore.de)).

BLZ945 was provided by Novartis, and transgenic animals used in the study, except for IFNAR<sup>fl/fl</sup>, were provided under an MTA and therefore cannot be directly provided by U.K.

**EXPERIMENTAL MODELS AND SUBJECT DETAILS****Animals, tamoxifen and BrdU treatment**

C57BL/6J*OlafHsd* mice, also referred to as wild-type (WT) mice, were purchased from Harlan-Winkelmann or Janvier. All mice used in this study are on the C57BL/6 background. In order to enable selective depletion of IFNAR on CNS cell subsets, *IFNAR*<sup>fl/fl</sup> mice (Kamphuis et al., 2006) were bred with *Nes-cre*<sup>+/-</sup> (Tronche et al., 1999), *Syn1-cre*<sup>+/-</sup> (Zhu et al., 2001), *GFAP-cre*<sup>+/-</sup> (Bajenaru et al., 2002), or *CX3CR1-cre*<sup>-ER+/-</sup> (Goldmann et al., 2013) mice. The absence of germline deletions for *IFNAR*<sup>fl/fl</sup> were verified by PCR analysis. *Rosa26eYFP*<sup>St/St</sup> mice (Srinivas et al., 2001) were bred with *GFAP-cre*<sup>+/-</sup> mice to assess the specificity of cre. In order to generate microglia specific td-tomato reporter animals, *CX3CR1-cre*<sup>-ER+/-</sup> mice were bred with *td-tomato*<sup>St/St</sup> mice (Madisen et al., 2010). IFNAR-deficient mice (*IFNAR*<sup>-/-</sup>) (Müller et al., 1994) were more than 20-fold backcrossed to the C57BL/6 background. Both male and female adult mice older than 8 weeks were included in experiments. Littermates were randomly assigned to experimental groups. In order to induce cre<sup>ER</sup> activity, animals were treated subcutaneously with 4 mg of tamoxifen (Sigma) two times with 48 h interval in between after weaning. In order to eliminate monocyte targeting, experiments were performed 8 weeks after tamoxifen treatment. In order to mark proliferating cells, animals were given 200 μl BrdU (Invitrogen) i.p. 12 hr and 3 hr before sacrifice. Animals were kept under specific pathogen-free conditions, with *ad libitum* food and water, in the central mouse facility of the TWINCORE and at the Helmholtz Centre for Infection Research. Animal experiments were conducted in compliance with German federal and state legislation on animal experiments.

**i.n. VSV infection**

For i.n. infection, mice were anesthetized with Ketamin/Rompun and a total of 10 μl containing 10<sup>3</sup> PFU of VSV in PBS were pipetted into both nostrils.

**Cell lines**

Pre-authenticated Vero and BHK-21 cells were purchased from ATCC®. Vero cells and BHK-21 cells were grown under standard cell culture conditions in MEM media containing 5% FCS at 37°C.

**Virus**

VSV-Indiana (Mudd-Summers isolate), originally obtained from D. Kolakofsky (University of Geneva, Switzerland) and VSV-eGFP kindly provided by Gert Zimmer, (University of Bern, Switzerland) (Hoffmann et al., 2010) were grown on BHK-21 cells. Virus was harvested from cell culture supernatants, and titers were determined by plaque formation on Vero cells.

## METHOD DETAILS

### VSV preparation and plaque assay

For VSV preparation, a confluent cell layer of BHK-21 cells was infected with VSV at MOI of 0.01 in MEM medium with 2% FCS for 1 h. Then, the medium was aspirated and cells were overlaid with fresh MEM medium containing 5% FCS. After 48 h the supernatant was harvested and centrifuged at 300 g for 6 min to remove cell debris. The virus stock was frozen at  $-80^{\circ}\text{C}$  and the titer was determined via plaque assay.

Measurement of infectious viral particles in supernatants was done by directly diluting supernatants in media. For measurement of infectious viral particles in organs, tissues were prepared at the indicated time points after infection, transferred to Lysing Matrix tubes (MP biomedical), and kept with either 500  $\mu\text{L}$  MEM medium (5% FCS) (small tissues), or 1000  $\mu\text{L}$  (big tissues). Samples were frozen at  $-80^{\circ}\text{C}$  until plaque assay was performed. Then, the samples were thawed and homogenized for 30 s (4 m/sec) in a sample homogenizer (MP biomedical). For OB, 500  $\mu\text{L}$  of medium was added to organ homogenate before samples were used in plaque assay. Serial 10-fold dilutions of homogenates were transferred onto Vero cell monolayer in 6-well plates and incubated for 1 h at  $37^{\circ}\text{C}$ . Monolayers were overlaid with 2 mL of MEM containing 1% methylcellulose and incubated for 24 h at  $37^{\circ}\text{C}$ . Then the overlay was removed, and the monolayer was fixed and stained using 0.5% crystal violet.

### Perfusion of mice

In order to determine the viral load in mouse organs, perform immunohistochemistry and to isolate CNS immune cells organs had to be freed of circulating blood in order to prevent falsification of results by virus particles or immune cells from the blood. Therefore, mice were anesthetized using ketamine \ xylazine mixture and horizontally pinned to a preparation block. The thorax was opened up and an incision was made to the diaphragm. The right lobe including the ribs was removed and a butterfly needle was inserted into the lower right ventricle. An incision was made to the lower left ventricle to allow blood to drain from the circulation system. PBS was flushed through the blood circulation system by gravitation and preferably the heartbeat of the mouse. When brains were taken for histology approximately 15 mL of 4% PFA was flushed after PBS to fix the organs. Perfusion was completed within approximately 5 min and afterward the organs were extracted and were further used for virus titer determination, immunohistology or isolation of immune cells from CNS.

### Immunofluorescence microscopy

Immunolabelling was performed as described previously (Skripuletz et al., 2015). Brains were post fixed overnight after removal from animals. 7  $\mu\text{m}$  sections were cut using microtome. Slices were dried overnight at  $37^{\circ}\text{C}$  and stored at room temperature. For immunolabelling, slices were deparaffinised in xylene followed by rehydration in ethanol gradient and incubation in PBS for 5 minutes. Antigen retrieval was done by boiling slices in citrate buffer for 5 min followed by 20 min incubation. Non-specific binding of antibodies was blocked by incubation with 10% goat serum and 0.1% Triton X-100 in PBS for 1 h. Slices were incubated with following primary antibodies at  $4^{\circ}\text{C}$  overnight: Iba-1 (rabbit, 1:300) and Mac-3 (rat IgG, 1:500), for proliferation Ki67 (mouse IgG, 1:50). Next day slices were washed with PBS to remove excess antibodies which was followed by incubation with secondary antibodies for 1 h at room temperature at a dilution of 1:500. This was followed by washing 3 times with PBS. Slices were mounted in mowiol containing DAPI (4', 6-diamidino-2-phenylindole) to counter stain nucleus. Pictures were taken on a BX61 microscope (Olympus). Original pictures were adjusted for brightness, contrast and color balance and post processed using ImageJ software (NIH). Cell counting was done using cell counter Plugin of ImageJ (Video S2). The exact procedure to use the Plugin is also given at the link: <https://imagej.nih.gov/ij/plugins/cell-counter.html>. The Plugin can also be downloaded using this link. Quantification of glial cells was performed for proliferating myeloid cells (double staining with Iba-1/Ki-67) and the total myeloid cell numbers (Iba-1<sup>+</sup>). Immunopositive cells with identified nucleus (counterstaining with 4', 6-diamidino-2-phenylindole (DAPI) for immunofluorescence) were counted and expressed as number of cells per  $\text{mm}^2$  area.

### Confocal microscopy and image analysis

For immunostaining 30- $\mu\text{m}$  serial cryosections were prepared for immunofluorescence staining. Briefly, sections were blocked with PBS containing 5% bovine serum albumin and permeabilized with 0.1% Triton X-100 in blocking solution. Primary antibody Iba-1 (1:500), Anti- $\beta$ -Tubulin III antibody (1:500) for neuronal cells and anti-GFAP antibody for detection of astrocytes (1:500) were added and incubated for 48 hours at  $4^{\circ}\text{C}$ . After washing, secondary antibodies goat anti-mouse IgG (H+L; DyLight 594) or goat anti rabbit Alexa Fluor 568 (1:500) was added for 24 hours at  $4^{\circ}\text{C}$ . Nuclei were counterstained with DAPI and mounted in fluorescence mounting medium. For morphological examination of microglia, tissue sections were analyzed on a confocal laser scanning microscope (LSM 780, Zeiss) using a 40x oil objective (Plan Apochromat, NA 1.4), laser excitation at 405 and 561 nm and LSM software ZEN 2012. To obtain z stacks of individual microglia images were acquired with a lateral resolution of  $75 \times 75$  nm and incrementally steps of 150 nm in axial direction. 80-150 images were collected for each z stack depending on the length of process extensions. Image restoration of 3D data were performed with Huygens deconvolution software (SVI) and displayed as maximum intensity projection. Quantification of microglial processes was done using the Simple Neurite Tracer Plugin by FiJi (Longair et al., 2011).



### Tissue clearance and 3D imaging

Animals were infected with VSV-eGFP as described. After perfusion, OBs and the immediately adjacent cerebral tissue were dissected and post-fixed overnight in 4% PFA at 4°C. Tissue was then cleared following the CUBIC clearance protocol (Susaki et al., 2015). Imaging was performed using a light-sheet fluorescence microscope (Ultramicroscope, LaVision Biotec) with 1.6x magnification, 10  $\mu$ m z-intervals and 5% overlap between tiles (Ertürk and Bradke, 2013; Ertürk et al., 2011). TIF files were stitched using the ImageJ 'Grid/collection stitching' Plugin (Preibisch et al., 2009). Image files were 3D rendered and visualized using Imaris software.

### BLZ945 treatment

For administration to mice, BLZ945 was formulated in 20% Captisol at a concentration of 12.5 mg/ml. For *in vivo* dosing, mice received 200 mg per kg body weight BLZ945 or vehicle (20% Captisol) by oral gavage once daily from 0 dpi until 6 dpi.

### Isolation of CNS immune cells, flow cytometry and sorting

CNS immune cells were isolated using density gradient centrifugation after digestion of brains with neural tissue digestion kit (p) following manufacturer's protocol for flow cytometry and with collagenase-D and DNase for sorting. Harvested brains were added to gentleMACS C tubes (Miltenyi Biotec) with 2 mL of digestion mixture. Tissue disruption was done in C tubes using gentleMACS Dissociator (Miltenyi Biotec) using program for brain. This was followed by digestion for 30 minutes. After digestion, enzymes were removed by PBS wash and pelleting of digested tissues by centrifugation. Percoll solutions of different densities were prepared in PBS using percoll. 4 mL 70% Percoll solution was added to the pellet and homogenization was done using needle and syringe to remove any clumps. This was underlaid a 30% and 37% percoll gradient using a long spinal cord needle and syringe. Gradients with tissues were centrifuged for 30 min, 500 g, RT, minimum brakes to separate the immune cells from myelin and other debris. Myelin and percoll from top of the cells were sucked off with vacuum being careful not to disturb the immune cell layer present between 37% and 70% percoll layer. Cell layer was transferred to fresh tubes using 1 mL micropipette and filled with MACS buffer to 15 mL. This was followed by centrifugation for 5 min at 300 g. Supernatant was removed with approximately 500  $\mu$ l left to resuspend the pellet. Resuspended pellet was transferred to a centrifuge tube and used for staining. Following antibodies were used for staining: CD45.2 Pacific blue, CD86 PE-Cy5, CD206 PE-Cy7, Ly6C Alexafluor700, CX3CR1 Brilliant violet 510, Ly6G PE-Cy7, CD11b APC-Cy7, and Rabbit Tmem119. BrdU staining was done using APC BrdU Flow Kit according to manufacturer's protocol using 2  $\mu$ l of anti-BrdU antibody. For Tmem119 staining anti-Rabbit Alexa-647 secondary was used. Data were acquired on an LSRII flow cytometer (BD Biosciences) and analyzed with FlowJo software. Cells were sorted on FACS Aria fusion sorter (Becton Dickinson).

RNA-seq FACS-sorted cells were sequenced on Illumina HiSeq RNA-Seq. Sequences from single-end 50 bp mouse samples were provided in FASTQ format and sequence quality control was assessed using the program FastQC (Andrews, 2010). Reads were aligned to the GRCm38 mouse genome assembly using STAR aligner and the number of reads mapping to each gene were counted using HTSeq-count (Anders et al., 2015). Filtering of the data included the exclusion of genes which did not present at least 10 counts in all the replicates. Normalization and differential analysis were performed using DESeq2 (Love et al., 2014) and genes that did not achieve 10 counts in all three replicates were filtered out. Pairwise comparison between the different conditions and populations was performed for each time point. Differential gene expression analysis were based on the negative binomial distribution and subsequent Wald statistical test (Love et al., 2014) and genes with false discovery rate (FDR) < 0.05 were considered to show significant differential gene expression. To assess overall similarities between samples the principle component analysis (PCA) was performed. The top differentially regulated genes depicted in the heatmap were subjected to log normalization and clustered using k means. Genes with a FDR < 0.05 and a minimum of two-fold change were shown in the Venn diagrams generated by using the Bioconductor package VennDiagram.

### QUANTIFICATION AND STATISTICAL ANALYSIS

Data are shown as mean  $\pm$  s.e.m. details about the number of technical (n) and biological replicates (N) is described for each dataset in corresponding figure legends. Cell numbers and viral titers were compared by the two tailed Mann-Whitney U test or by Kruskal-Wallis test unless otherwise stated in figure legends. For survival analysis, the Mantel-Cox survival analysis with log-rank statistics was used. For morphological analysis of microglia from each genotype 10–28 cells were investigated combined from two to three animals. Data represent the mean values of each analyzed cell. P value of 0.05 was considered statistically significant. For statistical analysis, the software package GraphPad Prism Version 5.0 was used.

### DATA AVAILABILITY

The RNA-seq data generated in this paper have been deposited in the NCBI Gene Expression Omnibus and are accessible through GEO Series accession number GSE110188 (<https://www.ncbi.nlm.nih.gov/geo/query/acc.cgi?acc=GSE110188>).

**Cell Reports, Volume 25**

## **Supplemental Information**

### **Type I Interferon Receptor Signaling of Neurons and Astrocytes Regulates Microglia Activation during Viral Encephalitis**

**Chintan Chhatbar, Claudia N. Detje, Elena Grabski, Katharina Borst, Julia Spanier, Luca Ghita, David A. Elliott, Marta Joana Costa Jordão, Nora Mueller, James Sutton, Chittappen K. Prajeeth, Viktoria Gudi, Michael A. Klein, Marco Prinz, Frank Bradke, Martin Stangel, and Ulrich Kalinke**

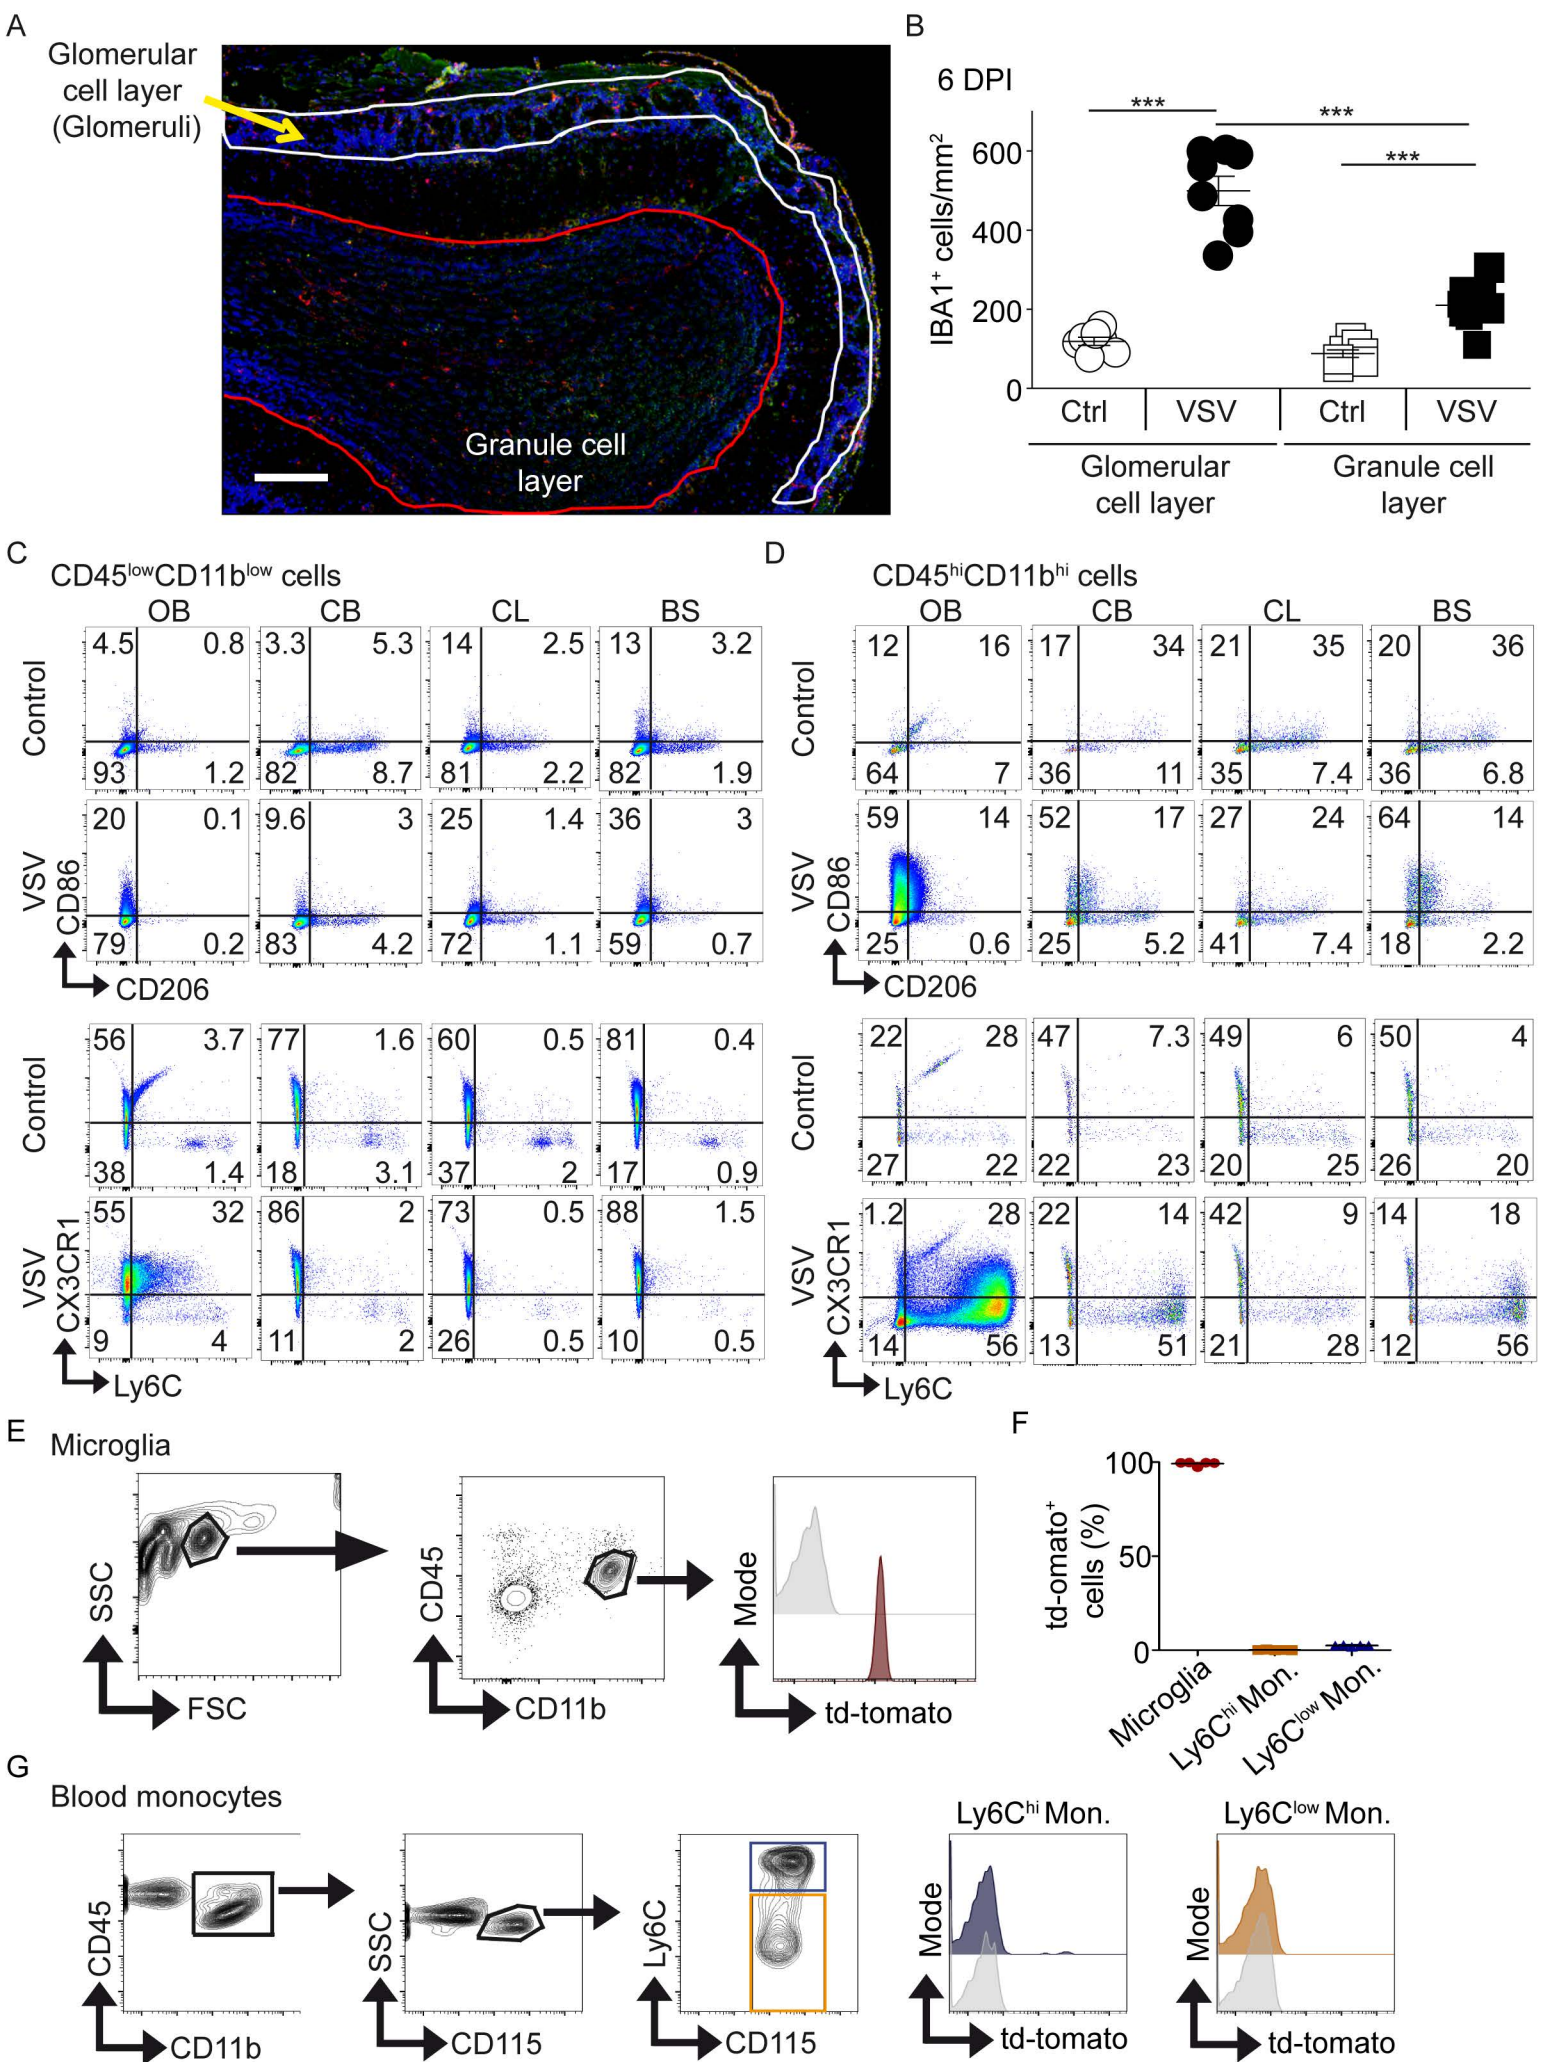

Supplementary Figure 1

**Supplementary Figure 1. Activated myeloid cells accumulate in the glomerular layer of the olfactory bulb (OB) upon VSV infection via intranasal route (Data related to Figure 1).** (A) Anatomy of the murine OB. The outer region of the OB marked by the white line is the glomerular cell layer containing glomerular structures, which are also called glomeruli. The central region marked by the red line is called granule cell layer. (B) Quantitation of Iba-1<sup>+</sup> cells in the OB glomeruli and the granule cell layer in Figure 1A on 6 dpi (n= 7-8, N= 2, combined data). (C) Representative data plots for expression of CD86 vs CD206 and CX3CR1 vs Ly6C on the CD45<sup>low</sup>CD11b<sup>low</sup> cells (black marked population in Figure 1E) in different brain regions. (D) Representative data plots for expression of CD86 vs CD206 and CX3CR1 vs Ly6C on the CD45<sup>hi</sup>CD11b<sup>hi</sup> cells (red marked population in Figure 1E) in different brain regions. (E) Analysis of td-tomato reporter protein expression in blood monocytes. *CX3CR1-cre<sup>ER+/-</sup>-td-tomato<sup>St/Wt</sup>* mice were tamoxifen treated after weaning and 8 weeks later the blood was collected and then mice were perfused and brain was prepared. Representative flow cytometry data for analysis of td-tomato expression on CD45<sup>low</sup>CD11b<sup>low</sup> cells from the brain (gray plot: untreated control. Red plot: tamoxifen treated sample). (F) Percentage of td-tomato<sup>+</sup> cells in brain (from E) and blood (from G) (n= 5, N= 2, combined data). (G) Representative flow cytometry data for analysis of td-tomato expression on Ly6C<sup>hi</sup> and Ly6C<sup>low</sup> blood monocytes in singlet population based on FSC and SCC (Grey plot: untreated control. dark grey plot and brown plot: tamoxifen treated sample). Data in B are shown as mean ± s.e.m. Scale bar in A is 200 μm.

A

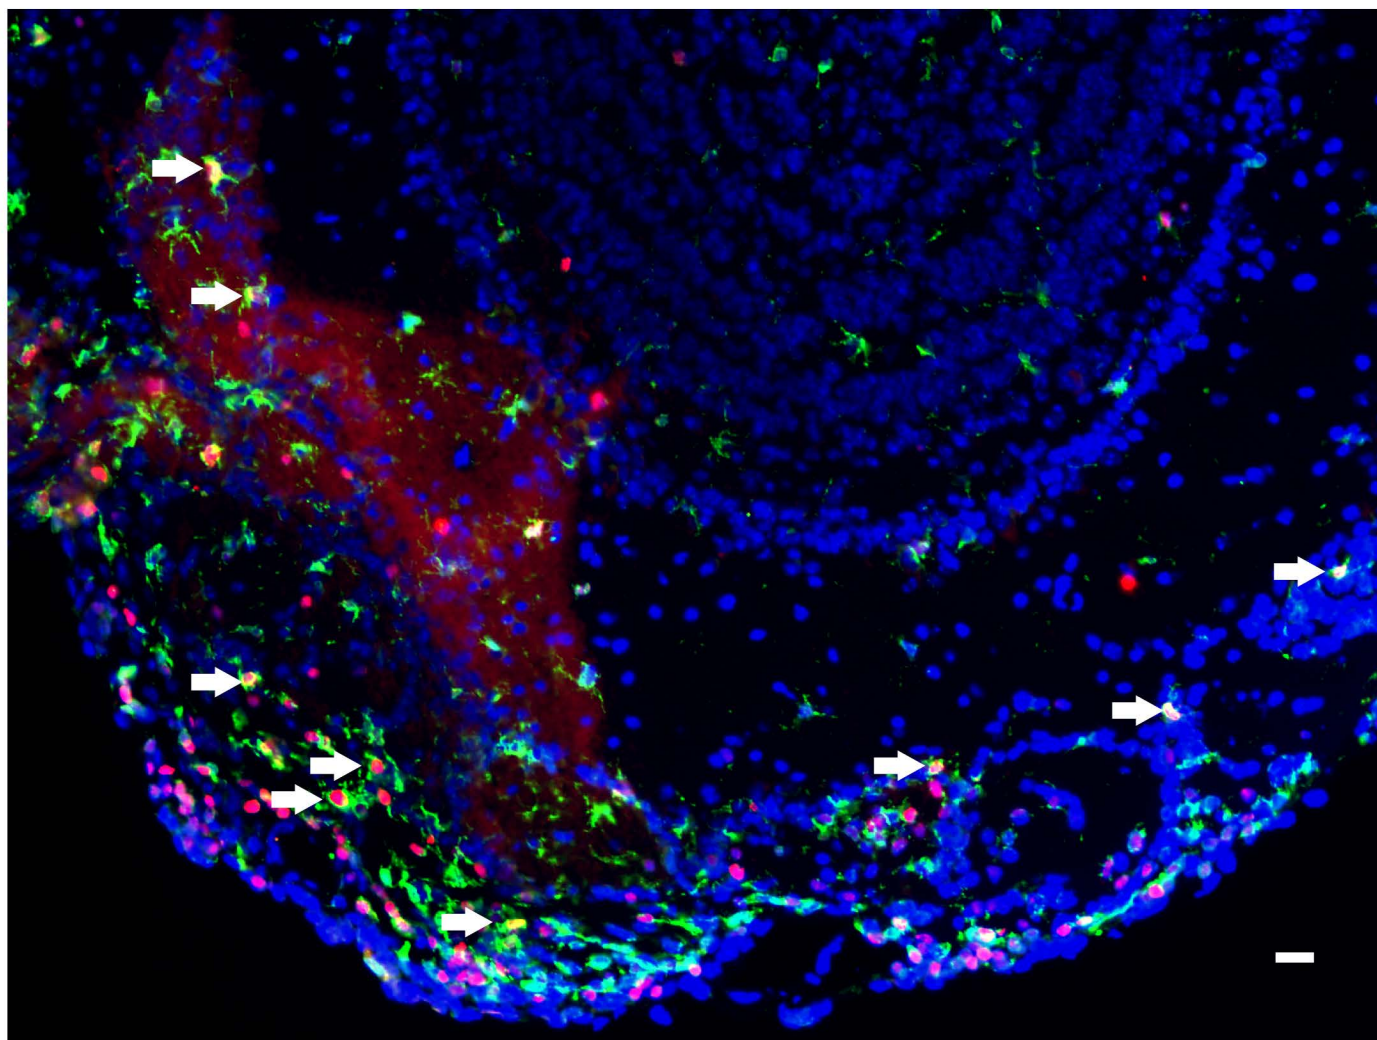

B

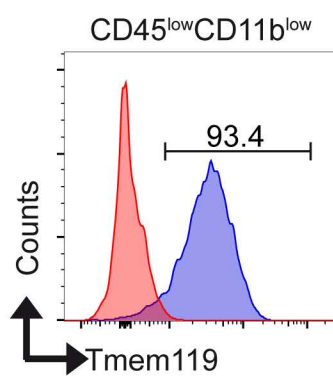

C

CD45<sup>low</sup>CD11b<sup>low</sup> cells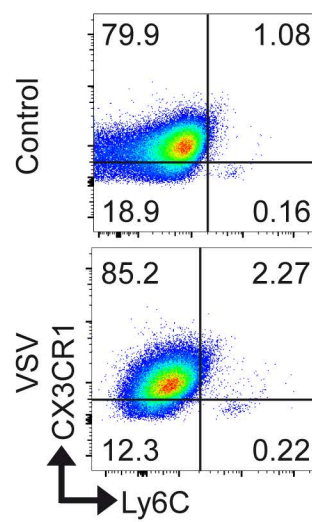

D

CD45<sup>hi</sup>CD11b<sup>hi</sup> cellstd-tomato<sup>+</sup> cells    td-tomato<sup>-</sup> cells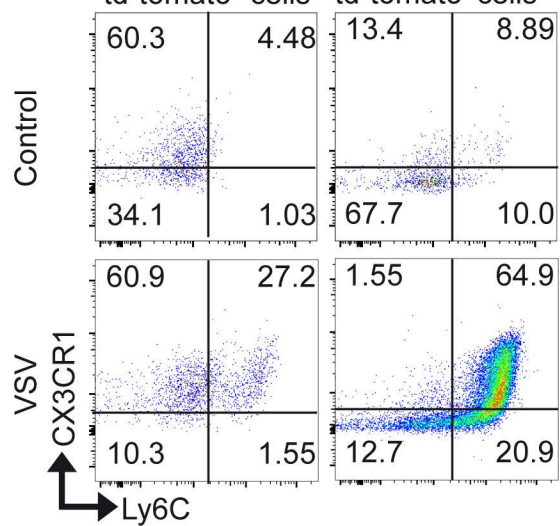

**Supplementary Figure 2. Activated myeloid cells proliferate within the OB of VSV infected mice and in tamoxifen treated *CX3CR1-cre<sup>ER+/-</sup>td-tomato<sup>St/Wt</sup>* mice CD45<sup>low</sup>CD11b<sup>low</sup> cells express microglia marker Tmem119 (Data related to Figure 2).** (A) Representative enlarged image of the Iba-1<sup>+</sup>Ki67<sup>+</sup> immunofluorescence staining of OB from VSV infected animal shown in Figure 2A. White arrows highlight some of the cells which are Iba-1<sup>+</sup>Ki67<sup>+</sup>. (B) Representative flow cytometry data for the expression of Tmem119 in CD45<sup>low</sup>CD11b<sup>low</sup> cells from the CNS of tamoxifen treated *CX3CR1-cre<sup>ER+/-</sup>td-tomato<sup>St/Wt</sup>* animals (Red plot: secondary control antibody only; blue plot: Tmem119 staining) (n= 5 total, N= 2). Representative data plots for the expression of CX3CR1 and Ly6C in (C) CD45<sup>low</sup>CD11b<sup>low</sup> population from CNS in Figure 2C and (D) CD45<sup>hi</sup>CD11b<sup>hi</sup>td-tomato<sup>+</sup> and CD45<sup>hi</sup>CD11b<sup>hi</sup>td-tomato<sup>-</sup> population from Figure 2E. Scale bar in A is 10  $\mu$ m.

*Hexb*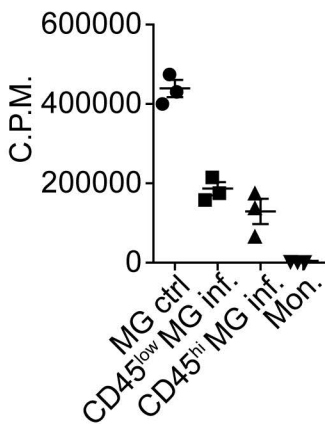*Fcrls*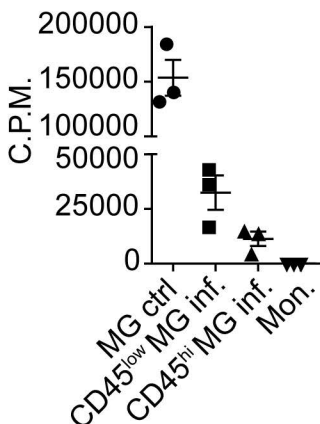*Cx3cr1*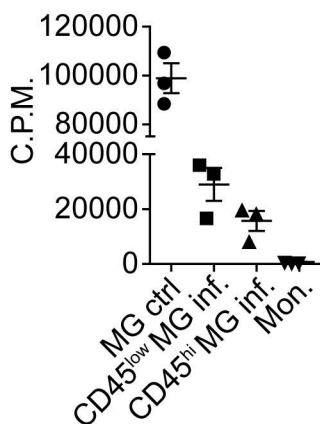*Siglech*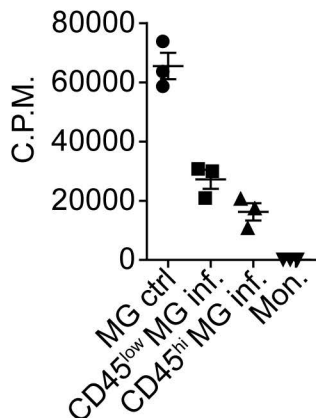*Nos2*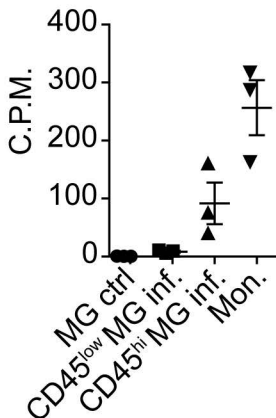*Mrc1 (CD206)*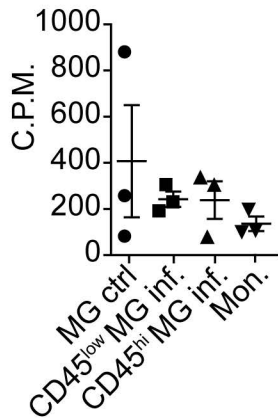

Supplementary Figure 3

**Supplementary Figure 3. mRNA expression levels of different CNS resident myeloid cell subsets (Data related to Figure 3).** mRNA expression levels of the indicated genes are shown for the indicated myeloid cell populations from Figure 3. Data are shown as mean  $\pm$  s.e.m.



A

CD45<sup>low</sup>CD11b<sup>low</sup> cells

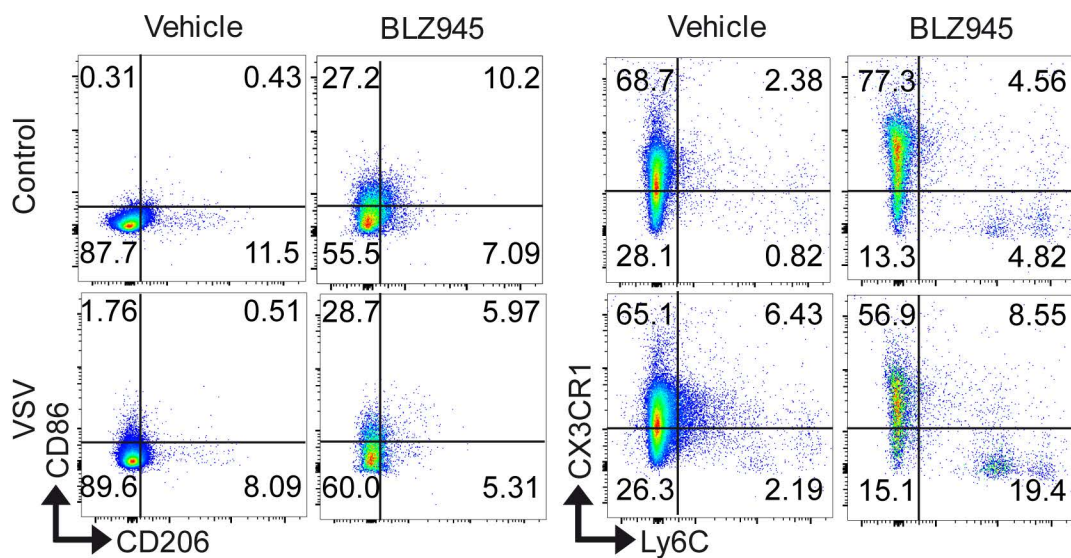

B

CD45<sup>hi</sup>CD11b<sup>hi</sup> cells

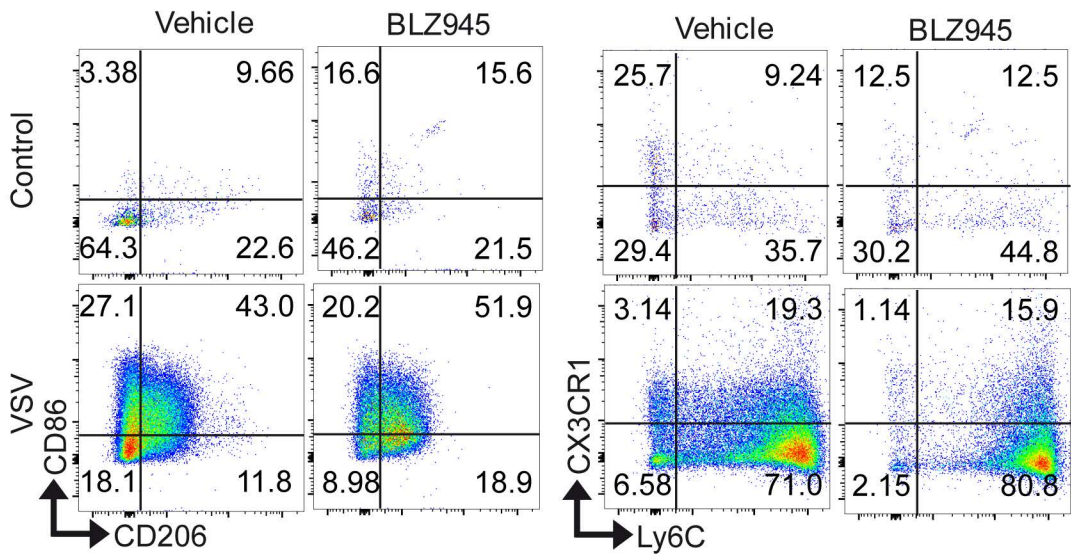

C

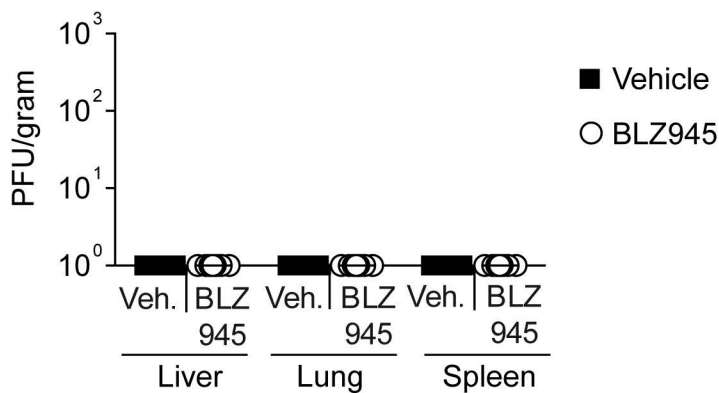

**Supplementary Figure 4. BLZ945 treatment does not induce general immune suppression**

**(Data related to Figure 4).** Representative data plots for expression of CD86, CD206, CX3CR1 and Ly6C in (A) CD45<sup>low</sup>CD11b<sup>low</sup> population from the CNS in Figure 4D and (B) CD45<sup>hi</sup>CD11b<sup>hi</sup> population from Figure 4D. (C) Virus titers in the liver, lung and spleen of the animals in Figure 4F (n= 10-11, N= 2, combined data). Data in C are shown as mean  $\pm$  s.e.m.

A

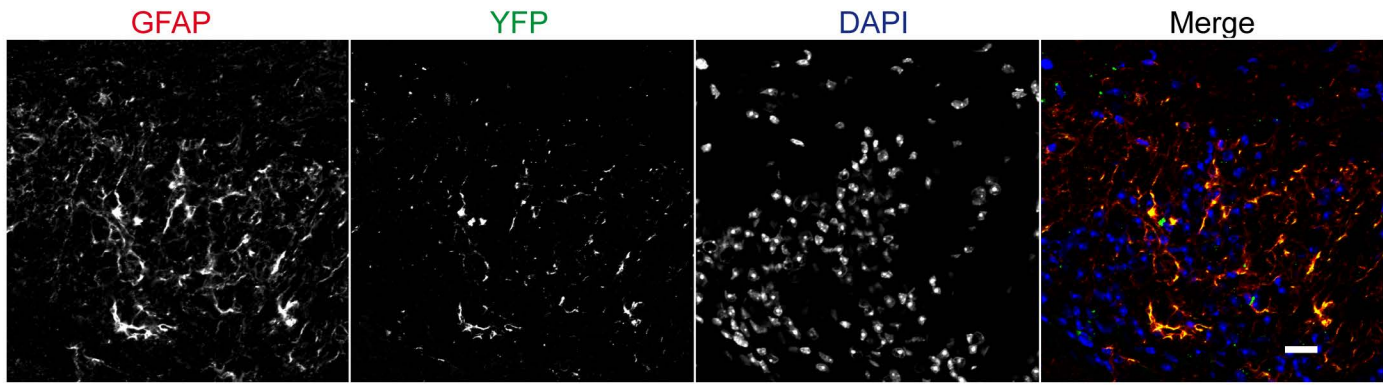

B

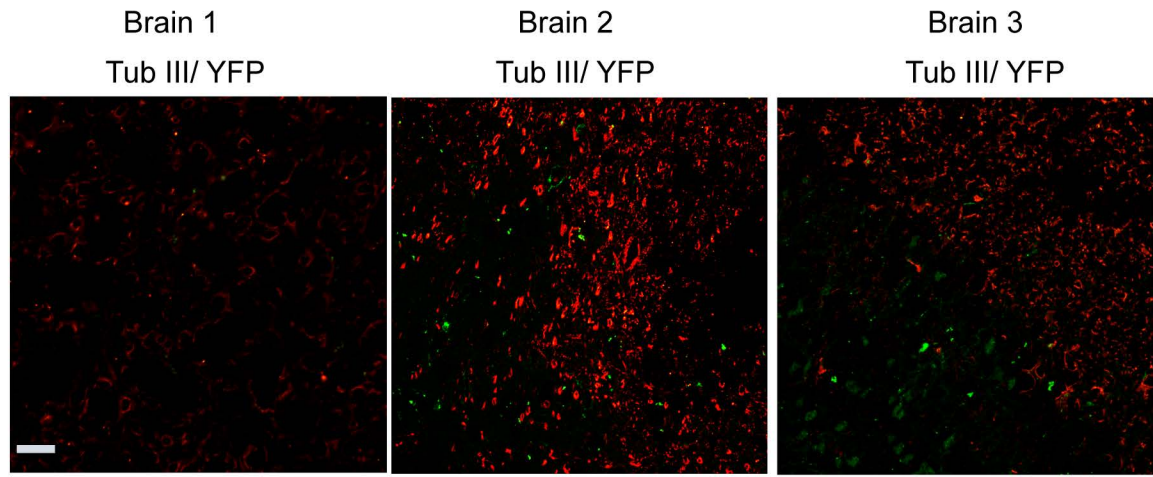

Supplementary Figure 5

**Supplementary Figure 5. GFAP-cre targets astrocytes but not neurons (Data related to Figure 5).** Untreated *GFAP-cre*<sup>+/-</sup>*Rosa26eYFP*<sup>S<sup>t</sup>/W<sup>t</sup></sup> mice aged between 10-12 weeks were sacrificed and brains were prepared for cryostaining. Brain slices were immunolabelled with anti-GFAP antibody or Anti-β-Tubulin III antibody, counter stained with DAPI and confocal microscopy was performed. Representative image showing expression of (A) GFAP, YFP and a combined image showing co-localization (n= 3) (B) β-Tubulin III (in red) and YFP (in green) showing mutually exclusive expression (n= 3). Scale bar is 20 μm.

A

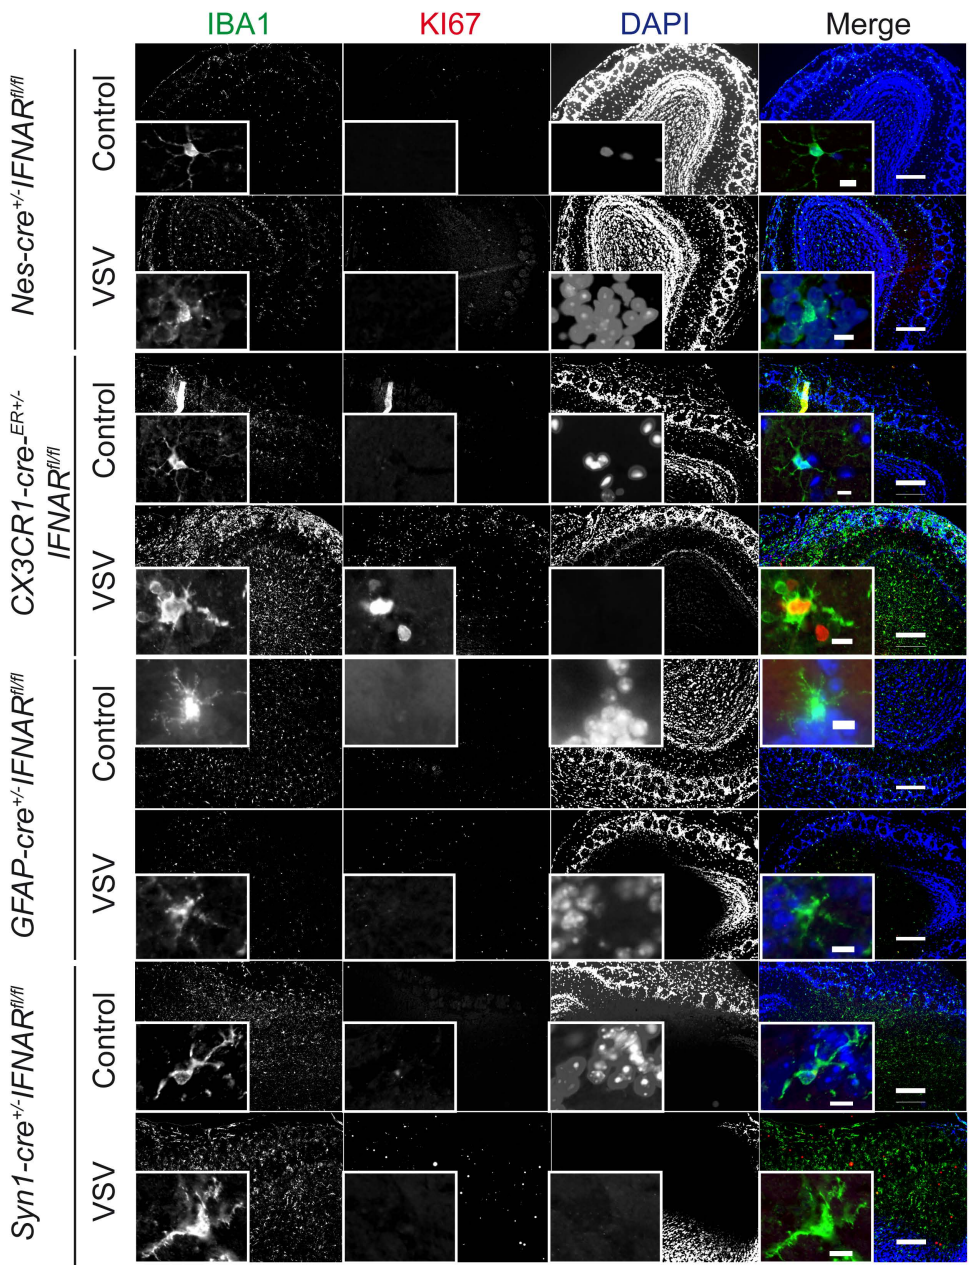

B

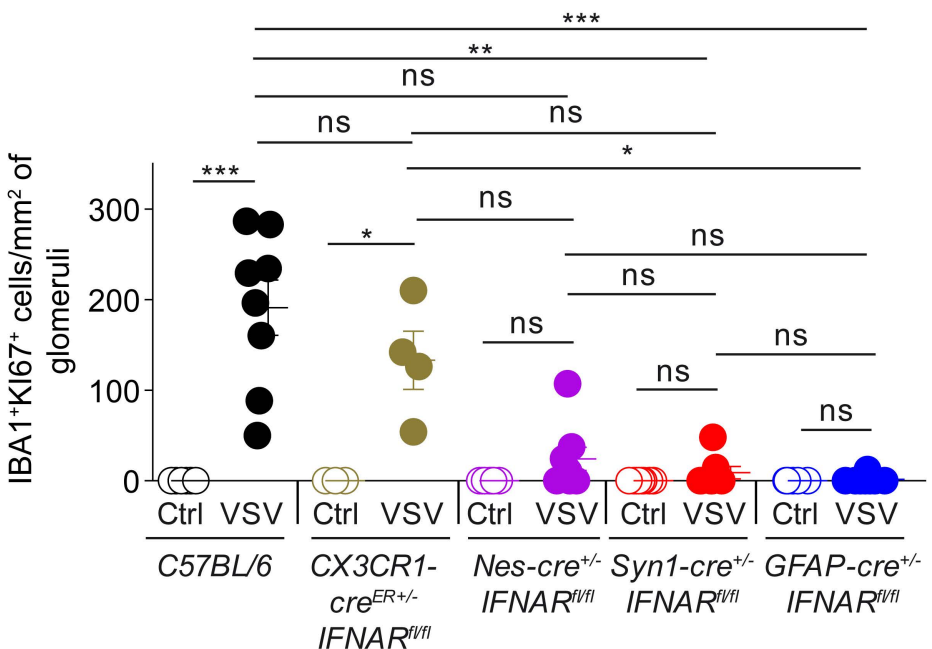

Supplementary Figure 6

**Supplementary Figure 6. IFNAR signaling of neurons and astrocytes, but not of microglia, is essential for microglia proliferation (Data related to Figure 5).** Animals were treated and brains were prepared as described in Figure 1. (A) OB slices were immunolabelled for Iba-1 and Ki-67, counter stained with DAPI and immunofluorescence microscopy was performed. (B) Quantitation of Iba-1<sup>+</sup>Ki-67<sup>+</sup> cells in the OB glomeruli in A (n= 4-8, N= 2, combined data). WT data are from Figure 2. Data in B are shown as mean  $\pm$  s.e.m. \*P < 0.05, \*\*P < 0.01, \*\*\*P < 0.001, ns= not significant. Scale bar in A is 200  $\mu$ m for main panels and 10  $\mu$ m for insets.

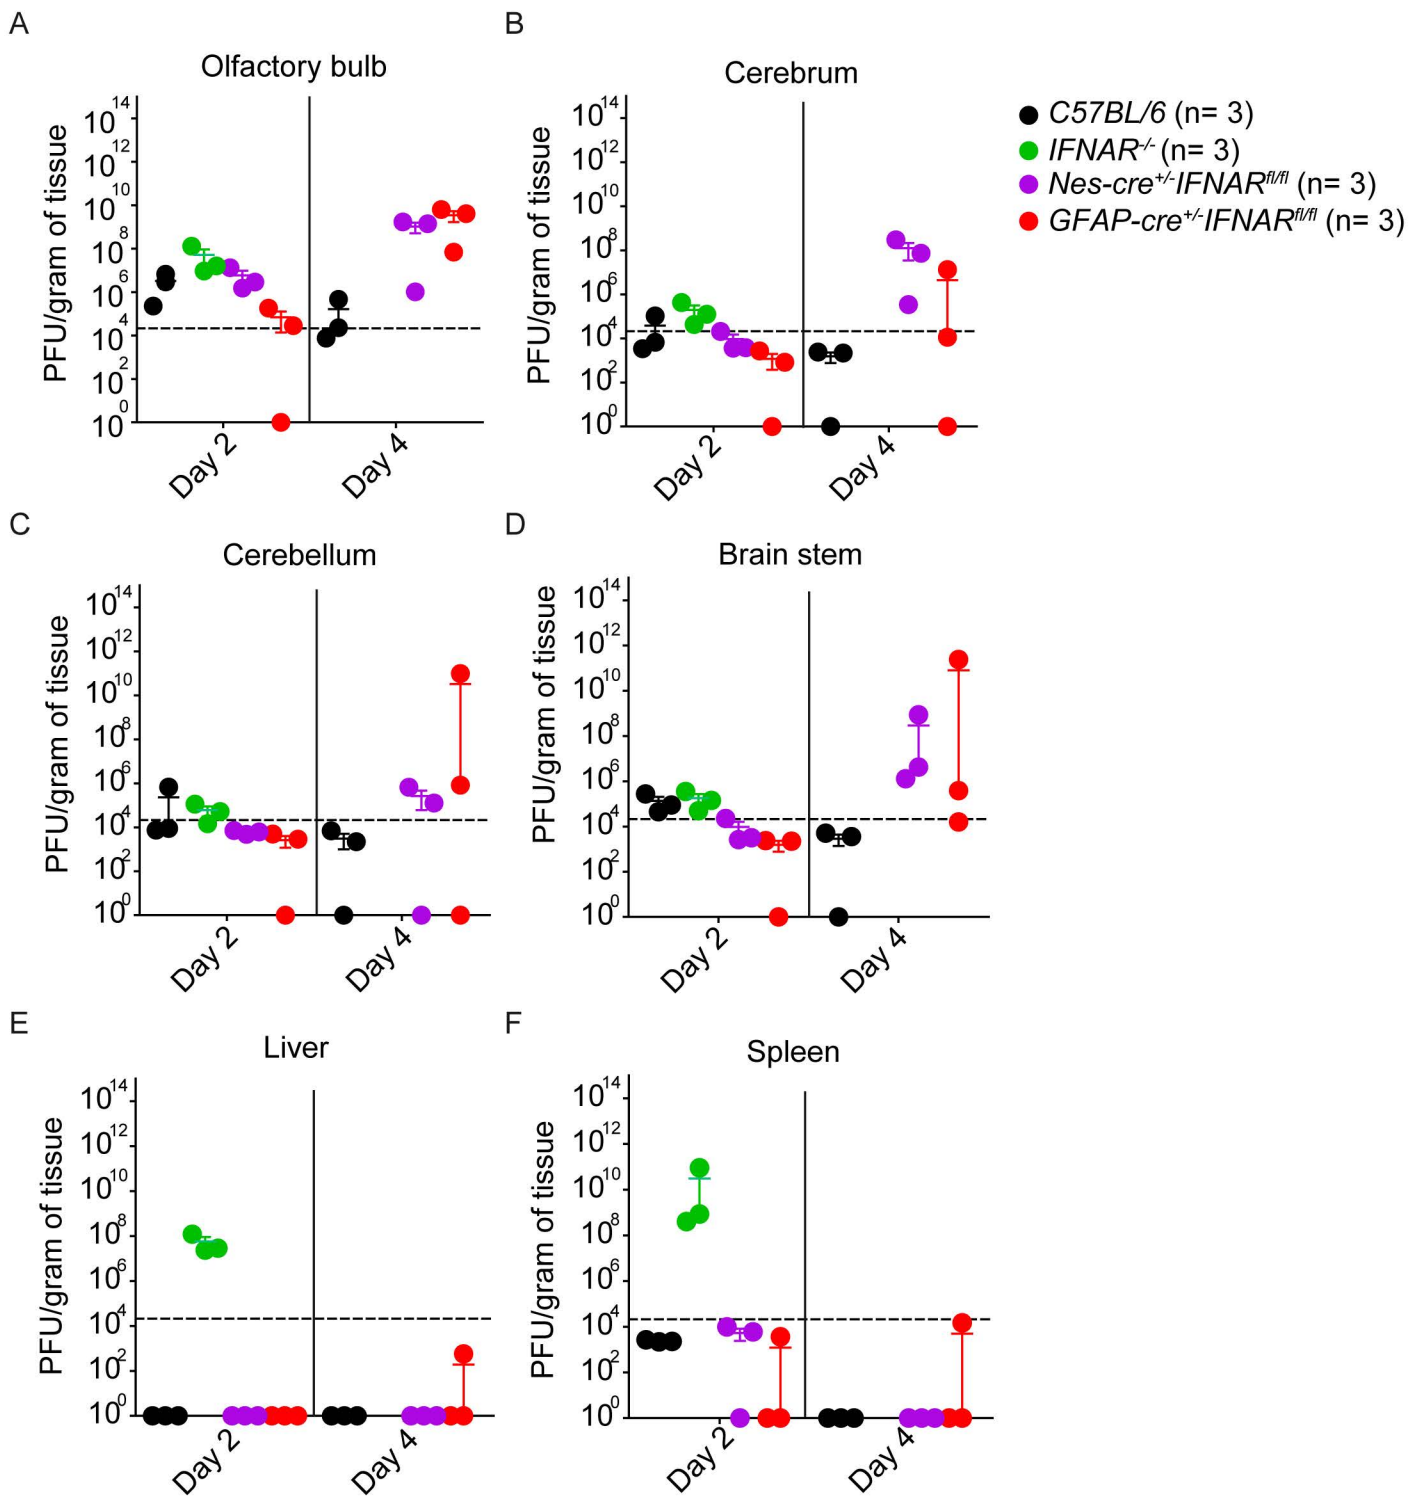

Supplementary Figure 7

**Supplementary Figure 7. IFNAR signaling of neurons and astrocytes is essential for restriction of VSV spreads in the CNS after intranasal infection (Data related to Figure 7).**

Viral titers of (A) olfactory bulb, (B) cerebrum, (C) cerebellum, (D) brain stem, (E) liver, and (F) spleen at 2 and 4 dpi after intranasal VSV infection in animals (n= 3 per genotype). Data are shown as mean  $\pm$  s.e.m.
